# Time Difference in the Social Transformation of China and Korea: A Case Study of Water-Moon Avalokiteśvara Paintings of the Song and Yuan Dynasties and the Koryŏ Dynasty

Hyun Joo Lee  
Zhejiang University

**Abstract:** The Water-Moon form of Avalokiteśvara arose in China during the process of nativization of Buddhism in Tang China. Extant images of Water-Moon Avalokiteśvara tend to have been painted in either China or Korea, but there is an odd dislocation in the changes of style, with the colorful Koryŏ dynasty images paralleling not contemporary Song trends but rather those from hundreds of years earlier. That this effect might simply be a delay caused by geographical distance seems unlikely given the active cultural exchange between the two realms. Dramatic changes occurred in the Tang-Song era, including the rise of plebeian culture and Zen Buddhism. This carried over to a more minimalist style of art in China. Meanwhile, in Koryŏ, Buddhism continued to receive royal sponsorship and remain influential. This article argues that the differences in images and techniques between Koryŏ and Song-Yuan paintings of Water-Moon Avalokiteśvara were caused by the time difference in the social transformations of China and Korea.

**Keywords:** Water-Moon Avalokiteśvara, Song-Yuan, Koryŏ, painting techniques, Tang-Song social transformation

There are no records of Water-Moon Avalokiteśvara in Buddhist scriptures because the Water-Moon Avalokiteśvara image was derived from the nativization of Buddhism in China. The *Lidai minghua ji* (歷代名畫記, Annals of Famous Painters of Successive Dynasties) shows that Zhou Fang 周昉 (ca. 730–805) was the painter who first created an image of Water-Moon Avalokiteśvara (Zhang Yanyuan 1985: 323). Some scholars argue that according to the *Tangchao minghua lu* 唐朝名畫錄 (Painting Masterpieces of the Tang Dynasty), Water-Moon Avalokiteśvara paintings were spread to the Korean peninsula during the Silla dynasty in the form of Zhou Fang paintings (Kikutake 1981: 10).

In the Koryŏ dynasty, a great number of heavily colored paintings of Water-Moon Avalokiteśvara were produced, and the approximately forty pieces still extant were mostly created in the fourteenth century. In the corresponding Yuan dynasty, artists, most of whom hailed from south of the Yangtze River, instead painted ink-wash Water-Moon Avalokiteśvara works (Yan Yamei 2000: 214).

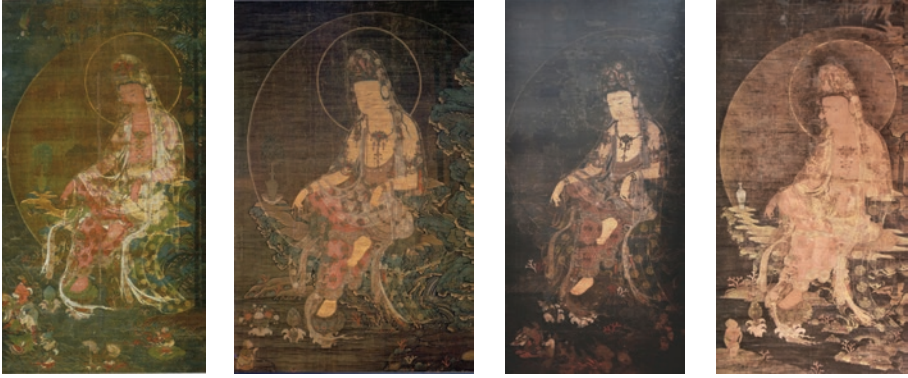

**Figures 1a–d.** (a) *Water-Moon Avalokiteśvara*, ink and color on silk, 229.7 cm×125 cm, Daitokuji 大徳寺, Japan (Kikutake and Chōng 1996: 207); (b) Sō Kubang 徐九方 (14th c.), *Water-Moon Avalokiteśvara*, 1323, ink and color on silk, 165.5 cm×101.5 cm, Sen'oku Hakukokan 泉屋博古館, Japan (Kikutake and Chōng 1996: 204); (c) *Water-Moon Avalokiteśvara*, ink and color on silk, 113.7 cm×55.3 cm, Metropolitan Museum of Art, USA (Center for Asian Studies, Zhejiang University 2017: 71); (d) *Water-Moon Avalokiteśvara*, ink and color on silk, 106.2 cm×53.8 cm, Amore Pacific Museum of Art, Korea (Kungnip Chungang Pangmulgwan 2010: 121).

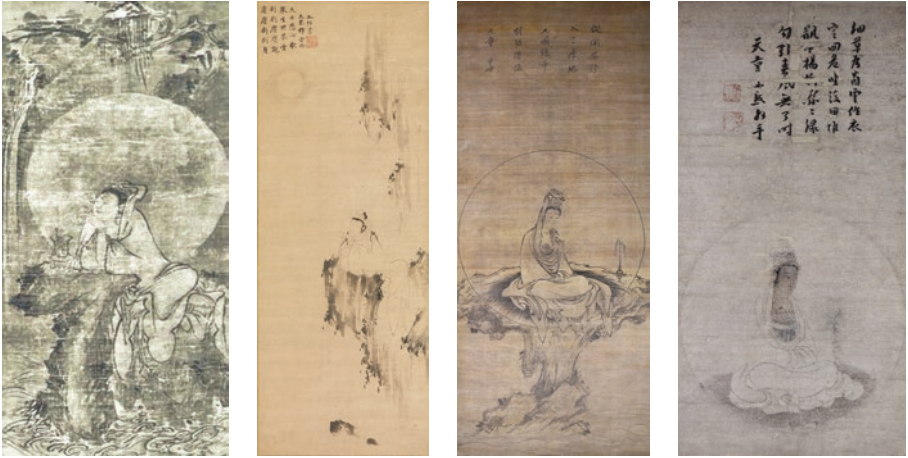

**Figures 2a–d.** (a) *Avalokiteśvara*, ink on silk, 76.6 cm×37.4 cm, private collection, Japan (Yan 2000: 230); (b) *Avalokiteśvara*, ink on silk, 91.7 cm×32.8 cm, Metropolitan Museum of Art, USA (Yan 2000: 245); (c) Zhengwu 正悟 (14th c.), *Avalokiteśvara*, ink on silk, 124.5 cm×53.0 cm, National Museum of Kyoto, Japan (Research Center for Ancient Calligraphy and Painting, Zhejiang University 2013: 4-2-16); (d) *Avalokiteśvara*, ink and color on paper, 51.3 cm×26.2 cm, National Museum of Kyoto, Japan (Research Center for Ancient Calligraphy and Painting, Zhejiang University 2013: 4-1-25).

Although Koryō and Yuan artists used different painting techniques, both of them produced many Water-Moon Avalokiteśvara images following formalized formats. Koryō and Yuan Water-Moon Avalokiteśvara paintings were drawn on the basis of several original versions (figs. 1a–d, 2a–d).

Differences in the social and Buddhist landscapes at the time led to the two different paths that Koryō and Song-Yuan artists followed in creating Water-Moon Avalokiteśvara paintings. Koryō Water-Moon Avalokiteśvara images have their roots in Tang China and had been continuously following the style begun by Zhou Fang. However, by the time of the Song and Yuan dynasties, Chinese Water-Moon Avalokiteśvara images were no longer painted in China in the Zhou Fang style. The techniques of Koryō and Yuan Water-Moon Avalokiteśvara paintings extant today can be seen in figures 1a–d and figures 2a–d. No Water-Moon Avalokiteśvara paintings from the Tang dynasty have survived, so techniques must be inferred from Water-Moon Avalokiteśvara paintings of the Five Dynasties. Although many heavily colored paintings were painted in the Ningbo area during the Song and Yuan eras, only one heavily colored Water-Moon Avalokiteśvara painting is extant, but many ink-wash Water-Moon Avalokiteśvara paintings remain. Concerning this change in the technique of Water-Moon Avalokiteśvara painting, most scholars believe that it is related to the development of ink-wash painting in China. However, it is noteworthy that not all Buddhist paintings were painted in ink-wash technique. Because Water-Moon Avalokiteśvara painting originated in China, this seems to be an important example of the Sinicization of Buddhist art.<sup>1</sup>

Most research on Water-Moon Avalokiteśvara paintings has focused on the heavily colored paintings of Water-Moon Avalokiteśvara found in Dunhuang or those that can be traced to Western Xia (西夏, 1038–1227) or Koryō, while less attention has been paid to the ink-wash paintings of Water-Moon Avalokiteśvara from the Song and Yuan eras. Koryō paintings of Water-Moon Avalokiteśvara that can be seen today are all heavily colored ones, and there are no ink-wash technique examples.<sup>2</sup> This article intends to reexamine the underlying cause of the evolution of these paintings from the perspective of social transformation, as well as the relationship between Koryō and Song-Yuan Water-Moon Avalokiteśvara paintings.

### **Disparities between the Water-Moon Avalokiteśvara Painting Techniques and Social Landscapes of Song-Yuan and Koryō**

Despite the concurrent existence of Koryō with Song and Yuan, the painting techniques of Water-Moon Avalokiteśvara differed greatly between the continent and the peninsula, with ink-wash practiced in Song and Yuan China (fig. 3) and heavy colors adopted in Koryō (fig. 4). The appearance and wide distribution of ink-wash Water-Moon Avalokiteśvara paintings in Song and Yuan are closely related to the Tang-Song social transformation—a concept advanced by the Japanese scholar Naitō Konan 内藤湖南 (1816–1934), the core of which is his thesis on the transition from the Middle Ages to early modern times. This process resulted in two changes: first, plebeian culture replaced aristocratic culture; second, paintings were no longer used as decorative furnishings but became instead a form of expressionist art (Naitō 1992).<sup>3</sup> As a result, Buddhist paintings became literati

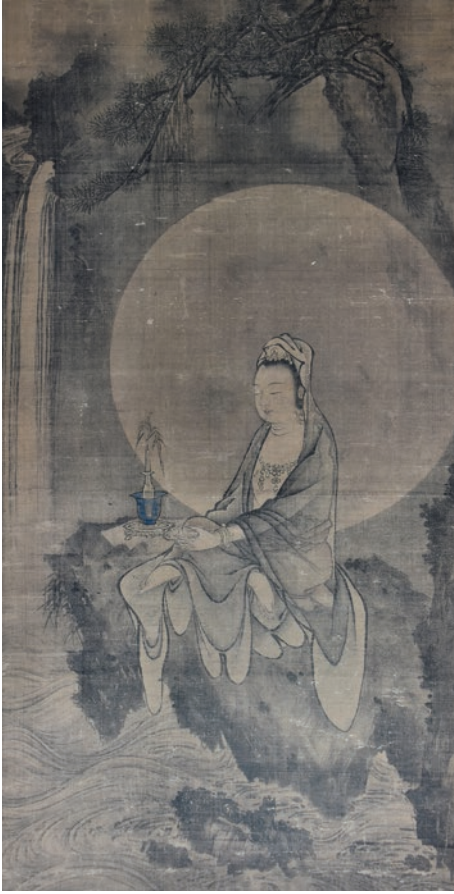

**Figure 3.** Yan Hui 顏輝 (14th c.), *Water-Moon Avalokitesvara*, Yuan, ink and color on silk, 111.1 cm×76.2 cm, Nelson Atkins Museum of Art, USA (Research Center for Ancient Calligraphy and Painting, Zhejiang University 2008: 6-5-180).

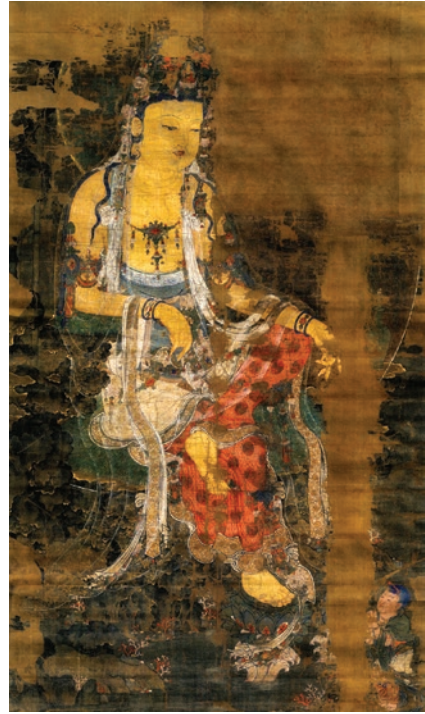

**Figure 4.** Kim Umun 金祐文 (14th c.), *Water-Moon Avalokitesvara*, completed in 1310, ink and color on silk, 530.0 cm ×300.0 cm, Kagami Jinja 鏡神社, Japan (Kikutake and Chōng 1996: 207).

ones, with heavy colors gradually replaced by ink-wash. Koryō, however, remained an aristocratic society, so it continued to follow Tang's vibrant painting techniques.

The Tang-Song transformation occurred during the mid to late period of the Tang dynasty, when revolutionary changes, characterized by the rise of Zen Buddhism and spearheaded by Huineng 慧能 (638–713), took place in Chinese Buddhism as well. Neo-Zen Buddhism (Xinchanzong 新禪宗), along with the Neo-Confucianism (Xinruxue 新儒學) and Neo-Taoism (Xindaojiao 新道教), which arose during the Northern and Southern Song dynasties period, formed the three most important schools of thought in China. They represented the emergence of a Chinese plebeian culture that displaced Tang aristocratic culture. Before the appearance of Huineng, Zen was not particularly different from other schools in



the Tang dynasty. Huineng's transformation of Zen made it more secularized and popularized. After Bodhidharma, Zen had traditionally followed the *Lankāvātāra sūtra* (*Lengjia jing* 楞伽經), while the Southern Sect started by Huineng emphasized the Diamond Sutra (*Jingang jing* 金剛經). Zen was easier than before in content and attracted a greater popular following (Liu 2003: 118).

During the Sui and Tang dynasties, there were many debates on Confucianism, Buddhism, and Taoism, and Buddhism played an important role in the reconciliation of the three religions. During the Five Dynasties period (907–79) and early Song dynasty, Buddhism underwent popularization and gradually evolved into “a combination of Zen and Pure Land Buddhism.” After the Song dynasty, although aristocratic doctrinal and scholastic Buddhism began to decline, Confucian-Buddhist interactions continued among scholar-officials and lay Buddhists (*jushi* 居士), and lay Buddhist culture continued to thrive (Sun C. 2000: 2297).

But Buddhism was gradually losing its creative vitality and was being replaced by the emerging Neo-Confucianism. The status and role of Buddhism in the field of ideological and scholarly research was greatly reduced. A group of monks well versed in both Buddhism and Confucianism emerged, whom some scholars called “Confucian monks” (*ruseng* 儒僧). These Confucian monks played an important role in facilitating communication between Buddhist monks and other intellectuals, and to a great extent, determined the developmental trajectory of Buddhism (Sun C. 2000: 2259–62). The decline of the status of Buddhism also directly affected Buddhist art. Whereas before the Tang dynasty, Buddhist art could be said to have formed the mainstream, with the decline of Buddhist influence, the number of Buddhist art works also decreased.

Starting with the Song dynasty, images from local Chinese Buddhist art began to treat themes which had not existed in the Buddhist classics: for example, the “cloth bag monk” and “Avalokiteśvara with long belt.” The belief in Avalokiteśvara also continued to grow on the basis of previous beliefs. These new images show that the nature of Buddhist art had begun to change from religious solemnity to literary enjoyment. In the process of this evolution, Water-Moon Avalokiteśvara images began to change in style (Ruan and Zhang 2011: 296). Buddha paintings gradually developed into aesthetic appreciation paintings, especially in Buddhist paintings with the themes of the Arhat and Avalokiteśvara. In scroll paintings with the themes of Arhats and Avalokiteśvara, the style changed from the magnificence of the early murals to an elegant and quiet style, pursuing the Zen style of ink-wash painting, and the aesthetic function far outweighed the didactic function. These changes and developments were mainly determined by socioeconomic developments and changes, not simply by changes in theme, style, and technique (Gong 2009: 19).

In the Song and Yuan dynasties, ink-wash paintings of Water-Moon Avalokiteśvara became stylized. Some scholars think that the reason for this is that they were produced in workshops. Some Japanese scholars suspect that as early as the Southern Song dynasty, such Buddhist painting workshops also created ink-wash paintings (of Water-Moon Avalokiteśvara, for example) in addition to heavily colored Buddhist paintings. In the painting *Five Hundred Arhats* (fig. 5) of Daitokuji temple executed in 1178, we can see that the picture of Avalokiteśvara in the

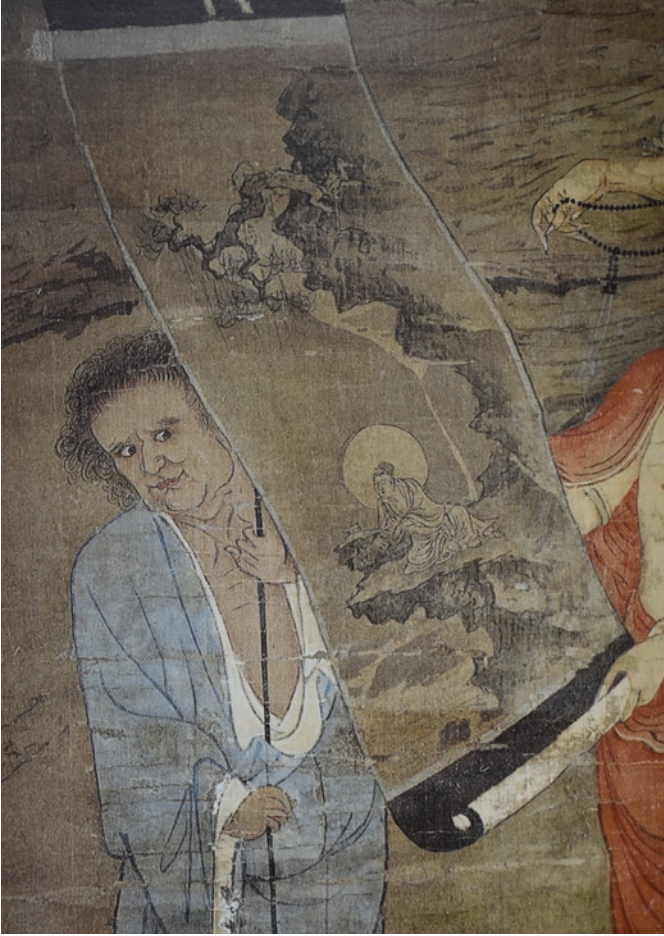

**Figure 5.** Zhou Jichang 周季常 (1178–1200), *Five Hundred Arhats*, Southern Song dynasty, ink and color on silk, 112.8 cm×53.4 cm, Daitokuji, Japan (Lin 1998: 241).

Arhat's hands is a Zen-style Water-Moon Avalokiteśvara painting. Thus, it appears that these Buddhist painters clearly had the skills to execute Zen ink paintings (Yan 2000: 215). It is my view that commercial, workshop-produced ink-wash paintings were fairly common during the Southern Song dynasty. We can infer from figure 5 that there was a great demand for Water-Moon Avalokiteśvara images at the time. The Arhat in the picture can be understood as a Zen monk or lay Buddhist of the time, and the Water-Moon Avalokiteśvara picture was their favorite type of work. Because the entire image of the Water-Moon Avalokiteśvara is like a landscape painting, the Water-Moon Avalokiteśvara paintings were not only objects of worship but also objects of people's appreciation (Wang H. 1987: 36).

Naitō Konan has argued that the Song dynasty was the beginning of the early modern period in China, five centuries earlier than in the West. Such a transfor-

mation did not take place on the Korean peninsula until the Chosŏn dynasty, five centuries later than in China. The Korean scholar Hō Hŭngsik believes that the beginning of the early modern period in Korea was closely related to the Neo-Confucian displacement of Buddhism, which was the state religion of Koryŏ.<sup>4</sup> The social transformation from Koryŏ to Chosŏn greatly resembled that from Tang to Song, as exemplified by the maturity of the imperial examination system, the collapse of the aristocracy, and the entry of ordinary people into officialdom. Koryŏ was an aristocratic society. Despite the practice of imperial examinations, candidacy for exams was limited to men of high social status, and most officials came from aristocratic families. The imperial examination system was introduced to Koryŏ in the ninth year of the Kwangjong 光宗 reign (958), when the royal patronage system (*ŭmsŏje* 蔭絛制) still allowed the children of officials who were of fifth or higher rank opportunities to be admitted and appointed to official positions (Pak Y. 1978: 63–64; Yi N. 2013).<sup>5</sup> The imperial examination system in China was implemented in the Sui (581–619) and Tang dynasties, but many talented literati were unable to obtain official positions through the examination. According to the *Xuanjuzhishang* 選舉志上 (Annals of Selection of Officials) in volume 4 of the *Xintangshu* 新唐書 (New History of the Tang), the majority of students in Confucian academies were children of high-ranking officials or aristocrats, and only a minority came from families of low-ranking officials or ordinary people (Zhou and Wu 2012: 37–47).

Parallel with the similarities between the societal and Buddhist landscapes of Koryŏ and Tang, the techniques of Koryŏ Water-Moon Avalokiteśvara closely followed the techniques of the Tang dynasty (Li Xuanzhou 2019). Kikutake Jun'ichi was the first to mention that Water-Moon Avalokiteśvara was introduced to Korea through Zhou Fang paintings in the Silla era (Kikutake 1981: 10). According to the entry on Zhou Fang in *Tangchao minghua lu* 唐朝名畫錄 (Celebrated Painters of the Tang Dynasty), “At the end of the Zhenyuan 貞元 period (785–805), the people of Silla purchased dozens of [Zhou Fang’s] works at a good price in Jianghuai 江淮 and carried them back to their own countries. His [Zhou Fang’s] paintings of Buddhist statues (*foxiang* 佛像), true immortals (*zhenxian* 真仙), figures and ladies, are all divine works (*shenpin* 神品)” (Zhu 1985: 6).<sup>6</sup> From this, we can see that Zhou Fang’s paintings were transmitted to Silla at that time. It is likely that his Water-Moon Avalokiteśvara paintings were among them.

According to the legend of the Avalokiteśvara sacred place of Putuo 普陀 Mountain in China, Silla merchants obtained a statue of Avalokiteśvara from Mount Wutai 五台山 and tried to bring it back to their own country, but the ship was stranded in front of Putuo Mountain and they had to place it in a palace (Xu Jing 1985: 119). The belief in Avalokiteśvara was also important to merchants crossing the sea (Cho 2011: 310–15). Thus, it is highly likely that there were paintings of Water-Moon Avalokiteśvara among the Zhou Fang paintings that ended up in Silla. The influence of Zhou Fang’s paintings on the painting of Koryŏ Water-Moon Avalokiteśvaras was such that the Koryŏ Water-Moon Avalokiteśvaras are called “Zhou Fang-style Water-Moon Avalokiteśvara” (Kikutake 1981).

As there are no surviving works, we cannot show the influence of Zhou Fang’s Water-Moon Avalokiteśvara paintings directly, but we can infer it through

the literature of the time. We find two mentions of Zhou Fang's Water-Moon Avalokiteśvara paintings in *Lidaiminghua ji*. The first is in volume 3: "Zhou Fang painted Water-Moon Avalokiteśvara on a partition screen in Shengguang 胜光 Temple located in Chang'an of the Tang dynasty, and the painting, depicting a halo and bamboo, was colored by Liu Zheng 劉整" (Zhang 1985: 36). Zhou Fang's Water-Moon Avalokiteśvara has a round light and bamboo as background. This work is a color painting. Bamboo is rarely seen in the ink-wash Water-Moon Avalokiteśvara paintings of the Song and Yuan dynasties but is an important feature of Koryŏ Water-Moon Avalokiteśvara images. The second mention is in volume 10 of the same work: "Zhou Fang, courtesy name Jingxuan 景宣, rose through the ranks to become deputy governor of a prefecture. . . . The Buddhist robes in his paintings became a standard and looked nothing like the clothing worn by ordinary people. They often looked colorful, magnificent and solemn. He is the father of Water-Moon Avalokiteśvara" (Zhang 1985: 323). The Avalokiteśvara in the Water-Moon Avalokiteśvara painting in Koryŏ is also a gorgeous and noble image, because it was made at the direction of imperial concubines or noblemen (Kim C. 2001: 137), but the clothing of the Song and Yuan Water-Moon Avalokiteśvara is commoner's clothing.

The Koryŏ Water-Moon Avalokiteśvara is a delicate, heavily colored painting. It uses precious pigments and clay gold. The Uihak Cultural Foundation in Korea, which owns one Koryŏ Water-Moon Avalokiteśvara painting, analyzed the pigments on the paper during the repair process. The results show that the red is cinnabar, the white is lead white, and the green is a copper compound. On top of this foundation, gold was added (Pak C. 1996: 73–75). Cinnabar is used for the red skirt of Avalokiteśvara, which symbolizes noble status, while the gold color is more brilliant and solemn. This kind of coloring is similar to Zhou Fang's. In Zhou Fang's works, aristocratic ladies often wear red dresses, for which Zhou Fang used cinnabar, which symbolized the dignity and nobility of the Tang dynasty, and he also used gold to great decorative effect (Wang X. 2009: 33).

Other important features of Zhou Fang's paintings in their color setting are the planarization of color application, multiple dyeing, and flat painting using primary colors. Most Koryŏ Water-Moon Avalokiteśvara paintings were done using primary colors.<sup>7</sup> In fact, the intermediate color in Koryŏ Water-Moon Avalokiteśvara paintings is the result of coloring the primary color many times. These images, pigments, and painting methods are different from those used during the Song and Yuan dynasties. The colors and patterns of Song and Yuan Buddhist paintings in Ningbo Province are more diverse than those of Koryŏ Buddha paintings. The Buddhist paintings from Song and Yuan mainly express three-dimensional or realistic feelings through color changes, repeating the use of pigments with a similar color in the same image. For example, for the representation of red, several kinds of red with different tones appear at the same time in a picture. This is not the same as the performance of plane decoration in Koryŏ Water-Moon Avalokiteśvara paintings (Chŏng 2011: 122). This is also the difference between the use of colors in Buddhist paintings of the Song and Yuan dynasties and that of the Tang dynasty. Comparing Koryŏ Water-Moon Avalokiteśvara images with the Zhou Fang portraits, the expressions of the lips, face-shaped hands, and transparent white clothes



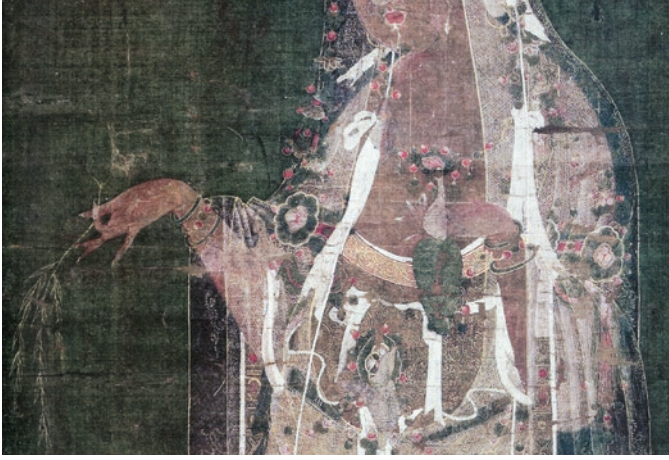

**Figure 6.** Hyeohō 慧虛 (14th c.), *Water-Moon Avalokiteśvara*, Koryō, ink and color on silk, 144.0 cm×62.5 cm, Sensōji 浅草寺, Japan (Kungnip Chungang Pangmulgwan 2010: 115).

**Figure 7.** Zhou Fang, *Lady Holding a Flower* (Zanhua shinū tu 簪花仕女圖), Tang, ink and color on silk, 144.0 cm×62.5 cm, Liaoning Provincial Museum, China (Shanghai Calligraphy and Painting Publishing House 2003: 4).

are similar (see figs. 6 and 7). Records show that Zhou Fang created Water-Moon Avalokiteśvara paintings in the Tang dynasty.<sup>8</sup> When Bu Kong 不空 (705–74) translated the Sutra of Life and Death (*Liaoben shengsi jing* 了本生死經), which involved the metaphor of water and moon, he was one of the distinguished monks valued by the royal family. Zhou Fang was a royal court painter at the time, so it seems this relationship had an important influence on the expression of his art (Li Ling 2002: 53). The painting style of Zhou Fang is a vibrant palace style, so his Water-Moon Avalokiteśvara paintings are also likely to have been painted in that style.

Water-Moon Avalokiteśvara was originally a symbol of the emptiness of the moon in the water, and because of this meaning, it was taken up by the Zen school, where it was influenced by social transformation and evolved into a Zen painting style or more secularized style. Considering Zhou Fang's lifespan (approximately 730–805) (Jin 1957: 34), we can speculate that any Water-Moon Avalokiteśvara paintings he had executed would date back to the mid or late Tang dynasty, when the empire was engulfed in the rebellion of An Lushan 安祿山 (703–57) and Shi Siming 史思明 (703–61) and subsequently entered into a critical period of transformation. This period of massive change left little time for the development of Zhou Fang-style Water-Moon Avalokiteśvara paintings. Therefore, the absence of Zhou Fang-style Water-Moon Avalokiteśvara paintings in China is not surprising.

Like the early Tang dynasty, Koryŏ was still an aristocratic society in which Buddhism served aristocrats and the royal family instead of being secularized. Therefore, the Water-Moon Avalokiteśvara images retained Zhou Fang's painting style of Water-Moon Avalokiteśvara, rather than adopting the more current ink-wash techniques of China. Furthermore, the style of golden landscape painting (*jimbishanshui* 金碧山水) was frequently used in Koryŏ Water-Moon Avalokiteśvara paintings and was a technique employed by Li Sixun 李思訓 (651–716) and his son Li Zhaoao 李昭道 (675–758) (An 2009: 276). Golden landscape paintings reached the peak of their development during the Tang dynasty, but after Li Sixun and his son, few painters excelled at golden landscapes. This may have been because their magnificent coloring style left little room for further development. Or perhaps it was because of the appearance of Wang Wei 王維 (701–61), whose ink-wash paintings were intended to give a feeling of poetry.<sup>9</sup> As a result, Li Sixun-style paintings gradually faded in popularity (Li D. 2014: 67).

Tang Hou's 湯垕 (1250–1310) *Gujinhuaqian* 古今畫鑒 (Appreciation of Painting Ancient and Present) documents that the technique of Buddhist painting practiced in the Western Regions of the Tang dynasty can be found in Koryŏ Water-Moon Avalokiteśvara paintings, which were elaborate and magnificent.<sup>10</sup>

From the above analysis, we can see that Koryŏ Water-Moon Avalokiteśvara paintings differ widely from those of the Song and Yuan dynasties but bear a closer resemblance to those of the Tang dynasty. This is further evidence of how Koryŏ Water-Moon Avalokiteśvara paintings were influenced by the social structure and Buddhist practices of Koryŏ.

### **Characteristics of the Themes of Water-Moon Avalokiteśvara Paintings and the Influence of Zen Buddhism**

The themes of ink-wash Buddhist paintings were mostly dominated by Zen. Despite the great changes in Buddhist paintings in the context of the Tang-Song social transformation, not all Buddhist themes were expressed in ink-wash paintings. In this regard, we should pay attention to local characteristics and the symbolic significance of the water and moon in Water-Moon Avalokiteśvara images.

Xuanzang's 玄奘 (602–64) pilgrimage to India to obtain Buddhist scriptures was a major factor contributing to the appearance of Water-Moon Avalokiteśvara imagery. Afterward, a large number of Buddhist scriptures, such as the *Avatam-*

*saka sūtra* (*Huayan jing* 華嚴經) and the Thousand-Hand Sutra (*Qianshou jing* 千手經), were translated into Chinese. Both provided a detailed depiction of the scene of Avalokiteśvara's enlightenment. Chinese Buddhist believers prayed for the Bodhisattva to build a "palace" in China as well, to show that it was entirely possible to move Avalokiteśvara's site of enlightenment to China (Li Li'an 2008: 404). The literati also played a crucial role in the localization of Buddhism. Images in the background of Water-Moon Avalokiteśvara paintings, such as bamboo, pines, and water, all resonated strongly with the literati. With the advent and rise of Zen Buddhism in the late Tang dynasty came more frequent interactions between Zen Buddhists and scholar-officials. Scholar-officials who pursued a reclusive life usually grew plants in their courtyards, among which bamboo was one of their favorites (Chi 2014: 31). With the literati increasingly involved in Buddhist art creation, bamboo was more frequently used in Buddhist paintings. At the same time, "the water and the moon," because of their poetic connotations, were also favored by the literati in artistic creations (Meng and Yu 2011: 70).<sup>11</sup>

Unlike common Buddhist paintings, Water-Moon Avalokiteśvara works do not have image-making rituals associated with them; no direct examples of their creation can be found in classic Buddhist records, and even the name "Water-Moon Avalokiteśvara" is rarely found in Buddhist classics (Meng and Yu 2011: 68).

Although Water-Moon Avalokiteśvara is not recorded in Buddhist scriptures, there are many metaphors associated with the moon in the water. In academic Buddhist writings, "the moon in the water" is often ranked as one of the top ten Buddhist metaphors (Yu J. 2012: 242). In the Tang dynasty, Xuanzang, after returning from India with many Buddhist sutras, began to promote "consciousness only" and developed his theory based on "dependent co-arising and emptiness" into a school which attracted a large following. The connection between the emptiness of the water and the moon and Avalokiteśvara may be based on the Heart Sutra aka *Mahāprajñā-pāramitā sūtra* (*Mohe boluomiduo jing* 摩訶般若波羅蜜多經). When rendering this sutra into Chinese, Xuanzang translated "Avalokiteśvara" as Guan Zizai 觀自在, which means to "perceive with ease," to emphasize the importance of meditation. In fact, the Heart Sutra was one of the most influential Buddhist scriptures in shaping Avalokiteśvara's theory of meditation,<sup>12</sup> thus offering the possibility for Water-Moon Avalokiteśvara paintings to evolve into Zen Buddhist works of art.

After Neo-Zen Buddhism was established by Huineng, the Sixth Patriarch, Zen Buddhism reached its zenith during the Five Dynasties and particularly the Northern and Southern Song dynasties. As a thoroughly Chinese school of Buddhism, Zen combined Indian Buddhism with traditional Chinese Confucianism and Taoism as a religious form that was well suited to the tastes of Chinese scholar-officials. Zen propagates a detached and go-as-you-please attitude toward life. Instead of encouraging believers to chant scriptures, observe precepts, and worship the Buddha, it teaches followers to directly reach the self-nature and attain Buddhahood by means of sudden enlightenment (頓悟). This view found a strong echo in the life philosophy and aesthetic pursuits of Song Chinese literati and scholar-officials (Xu 1991: 12). Thus, Zen Buddhism had a profound impact on the society and culture of the Song dynasty. In this context, Zen Buddhist themes

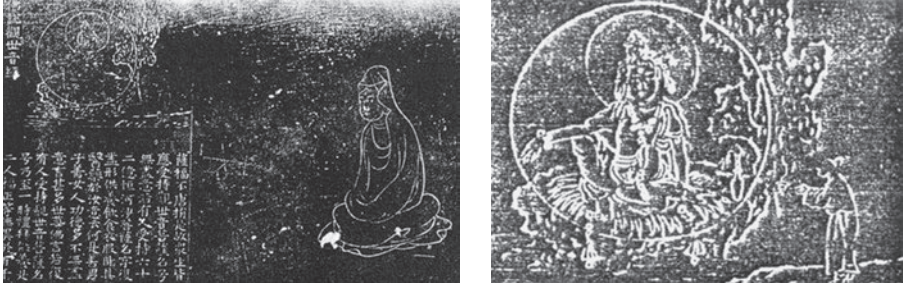

**Figures 8a–b.** Li Gonglin, *Water-Moon Avalokiteśvara*, Northern Song, mural stele, Liuhe 六和 Pagoda in Kaihua 開化 Temple, Hangzhou, Zhejiang Province (Pan 2000: 92).

expressed through Water-Moon Avalokiteśvara and their local relevance, combined with the rise of Neo-Zen Buddhism and lay Buddhism, would inevitably result in the employment of the ink-wash technique in the creation of Water-Moon Avalokiteśvara paintings (Li X. 2016: 19–46).

The Song dynasty is a critical turning point in the evolution of the image of Water-Moon Avalokiteśvara, which was greatly influenced by two painters: Li Gonglin 李公麟 (1049–1106) and Mu Xi 牧溪 (1210–70). Figure 8 is an important turning point in the development of Water-Moon Avalokiteśvara paintings. Unlike Water-Moon Avalokiteśvara images from Dunhuang, Song Water-Moon Avalokiteśvara images exhibit changes in the following three elements: the changed robe, the combination of the willow branch and the water bottle, and the appearance of the straw mat (Yi H. 2016). These changes took place due to a shift in public perception. When the pursuit of enlightenment and the way of the Bodhisattva as preached in the *Avatamsaka sūtra* during the Song dynasty transformed the image of Water-Moon Avalokiteśvara, the willow branch and the water bottle gradually lost their prominence as ceremonial props of Esoteric Buddhism, becoming separated from the hands of Avalokiteśvara, and were instead placed as part of the background (Song 1999: 49).<sup>13</sup> This implies that Water-Moon Avalokiteśvara paintings attached greater importance to Zen after Li Gonglin.

The white robe, willow branch, and water bottle and grass mats can be seen in Mu Xi's painting (fig. 9). These had a great influence on later Water-Moon Avalokiteśvara paintings. Compared with the previous instances of the Water-Moon Avalokiteśvara, the background of Water-Moon Avalokiteśvara paintings from the Yuan dynasty is much simpler (see figs. 2a–d). The Water-Moon Avalokiteśvara in the Thirty-Three Body Avalokiteśvara 三十三體觀音 collection features the image of Avalokiteśvara standing on lotus petals to view the moon in the water. This kind of image (fig. 10) is different from that of Zhou Fang's Water-Moon Avalokiteśvara and reflects that painters at the time paid more attention to the idea of the space of the moon in the water.

However, Buddhism in Koryŏ was different from that practiced in Song. From the Silla to the Koryŏ dynasty, there had been constant disagreement between Zen



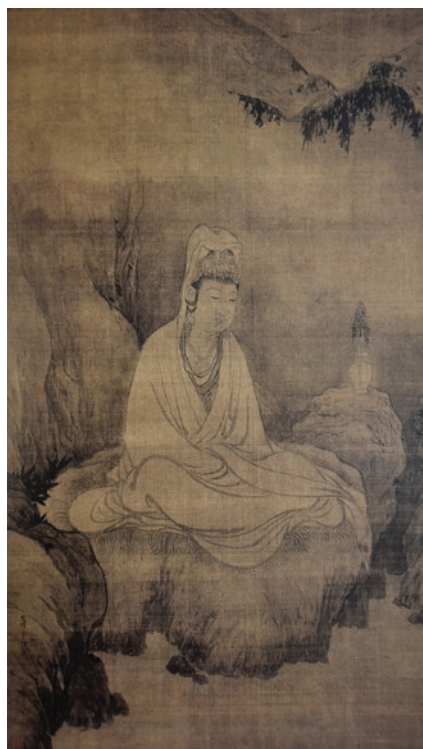

**Figure 9.** Mu Xi, *White-Robed Avalokiteśvara*, Southern Song, ink on silk, 172.2 cm×97.6 cm, Daitokuji, Japan (Lin 1998: 146).

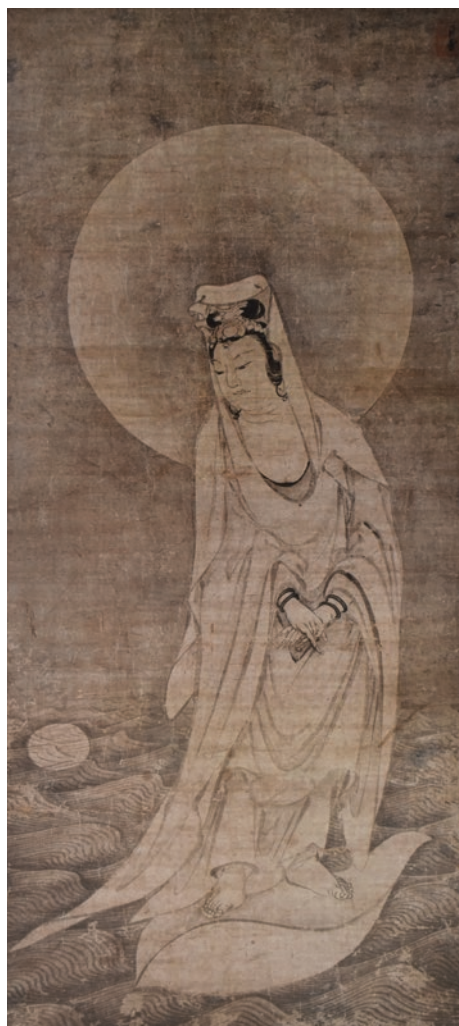

**Figure 10.** Yue Hu 月壺 (14th c.), *White-Robed Avalokiteśvara*, Yuan, ink on paper, 77.1 cm×34.8 cm, MOA Museum, Japan (Research Center for Ancient Calligraphy and Painting, Zhejiang University 2013: 4-1-141).

Buddhism and doctrinal Buddhism, which were in opposition and developed in isolation from each other. In the Koryŏ dynasty, the “Nine Mountain” schools of Zen Buddhism coexisted with doctrinal schools, a situation that was similar to Tang. The spread of Zen Buddhism was also impeded by the extreme conservatism of society, and its decline was further accelerated by Ŭichŏn 義天 (1055–1101), who championed the Ch’ont’ae 天臺 school of Buddhism (Ch’oe Pyŏnghŏn 1983).

During the mid-Koryŏ dynasty (1170–1270), military officials rose to political power.<sup>14</sup> They supported Zen Buddhism while suppressing doctrinal Buddhism, as the latter was closely connected with scholar-officials, political clans, and aristocrats. Backed by military officials, a widespread social movement centered on Zen

Buddhism arose. Led by rural intellectuals, this movement was a reflection of, as well as a response to, the collusion between political clans and Buddhists (Ch'ae Sangsik 1979). Yi Kyubo 李奎報 (1168–1241), a scholar during this period of military rule, once described ink-wash Water-Moon Avalokiteśvara paintings in one of his essays.<sup>15</sup> This suggests that the appearance of ink-wash paintings of Water-Moon Avalokiteśvara closely paralleled the social situation. Despite the blossoming of lay Buddhism, Koryŏ people in the fourteenth century suffered greatly from the wars that had broken out due to political intrigues by the Yuan.

Under such circumstances, many Buddhists proposed self-consciousness and self-reflection, emphasizing the benefits of chanting Buddhist scriptures and believing in Pure Land Buddhism (Chŏngt'ojong 淨土宗). It is in this context that the upper class of Koryŏ led the mass production of heavily colored Water-Moon Avalokiteśvara paintings (Mun 2015: 382). Thus, unlike the Song and Yuan dynasties, in the Koryŏ dynasty there were virtually no Zen Buddhism-influenced ink paintings, but instead many heavily colored Water-Moon Avalokiteśvara paintings, which were commissioned acts of devotion with the hope that they would bring blessings in a troubled time.

### **Comparison between Song and Koryŏ Paintings of Water-Moon Avalokiteśvara**

Generally speaking, Koryŏ paintings of Water-Moon Avalokiteśvara adopted the heavily colored painting technique of Tang, but locally, there were many similarities between Koryŏ and Song paintings (Yi H. 2019: 119–213), such as the white robe (figs. 11a–d, 12a–d, 13a–d), the water bottle (figs. 14a–c, 15a–c, 16a–c), and the straw mat (figs. 17a–c). Most current research is centered on the relationship between Koryŏ Water-Moon Avalokiteśvara and images of the same found in regions to the west of China like Western Xia (Pak T. 1998). Nevertheless, post-Song aspects of Water-Moon Avalokiteśvara images are also to be found in Koryŏ paintings. Moreover, these expressions are more similar to each other than are those between the Western Xia paintings and Koryŏ paintings. For instance, in the Song-Yuan and Koryŏ paintings, Avalokiteśvara's gaze was cast downward, which was the manifestation of Avalokiteśvara's meditation (figs. 11a–d and 12a–d). By contrast, the gaze of the Avalokiteśvara in the Water-Moon Avalokiteśvara images from the Western Regions is slightly upward, while the attire and decoration are conspicuously different (figs. 13a–d).

This comparison reveals that although Koryŏ artists did not adopt the ink-wash technique, they nonetheless borrowed certain local elements of Song Water-Moon Avalokiteśvara paintings. This local adoption of painting techniques from Song and Yuan was facilitated by cultural exchanges between both sides, which can be proven by abundant historical records (Huang 2009; Sun X. 2007). Between the late eleventh and early twelfth century, Koryŏ engaged with Song to boost its culture and fine arts. During this period, the Northern Song also conceived a military strategy to “ally itself with Koryŏ to contain Liao (907–1125),” hoping to launch a war against Liao, with Song attacking from the south and Koryŏ from the north (Kim W. 2004: 176–80). In addition, maritime trade prospered between the

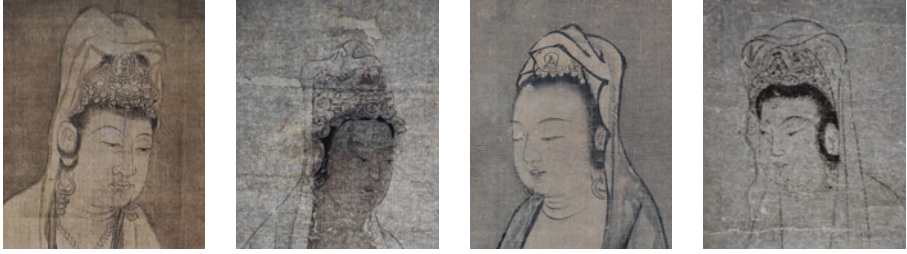

**Figures 11a–d.** Comparison of posture, decorations, and headgear, Song and Yuan dynasties: (a) Lin 1998:146; (b) Research Center for Ancient Calligraphy and Painting, Zhejiang University 2013: 4-1-25; (c) Research Center for Ancient Calligraphy and Painting, Zhejiang University 2008: 6-5-180; (d) Research Center for Ancient Calligraphy and Painting, Zhejiang University 2013: 4-1-110.

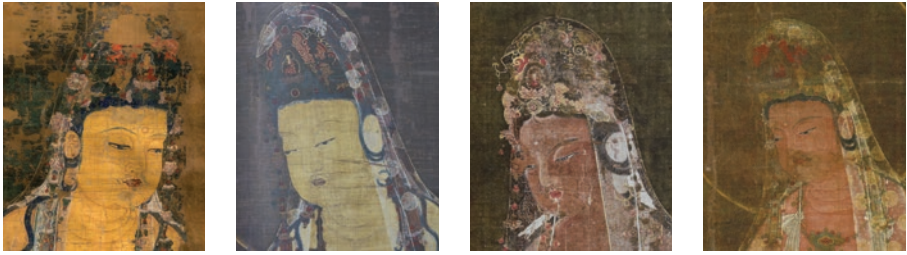

**Figures 12a–d.** Comparison of posture, decorations, and headgear, Koryŏ dynasty: (a) Kikutake and Chŏng 1996: 201; (b) Kikutake and Chŏng 1996: 204; (c) Kungnip Chungang Pangmulgwan 2010: 115; (d) Kikutake and Chŏng 1996: 207.

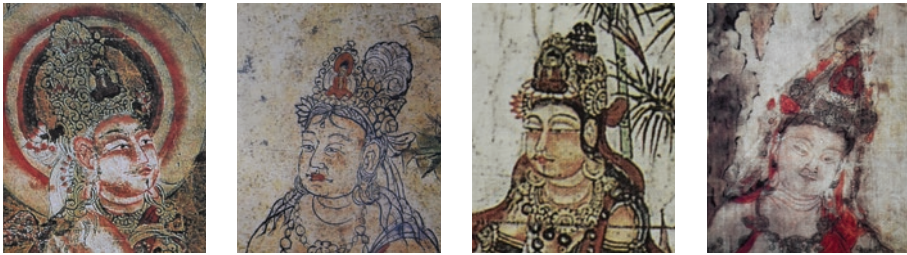

**Figures 13a–d.** Comparison of posture, decorations, and headgear, Five Dynasties, Western Xia: (a) Lin 1998: 15; (b) Ma and Meng 2012: 3; (c) Lin 1998: 74; (d) Kungnip Chungang Pangmulgwan 2010: 207.



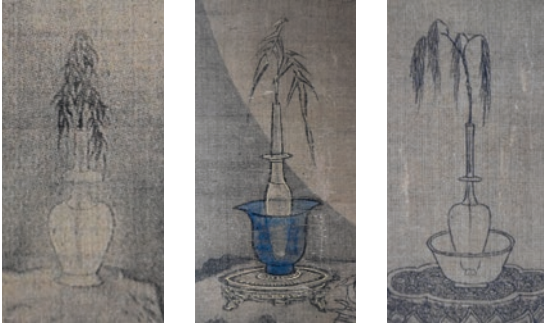

**Figures 14a-c.** Comparison of water bottle, plate, and willow branch, Song and Yuan dynasties: (a) Mu Xi (Lin 1998: 146); (b) Yan Hui (Research Center for Ancient Calligraphy and Painting, Zhejiang University 2008: 6-5-180); (c) Wang Zhenpeng 王振鹏 (14th c.) (Research Center for Ancient Calligraphy and Painting, Zhejiang University 2013: 4-1-50).

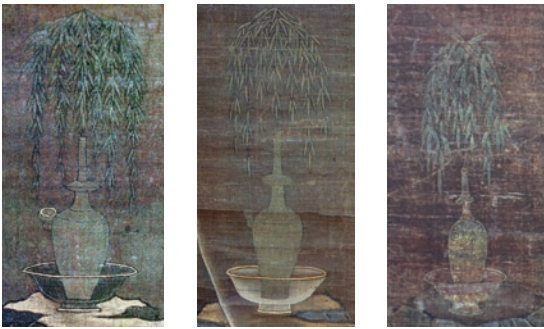

**Figures 15a-c.** Comparison of water bottle, plate, and willow branch, Koryŏ dynasty: (a) Daitokuji (Kikutake and Chŏng 1996: 207); (b) Sen'oku Hakukokan (Kikutake and Chŏng 1996: 204); (c) Guimet (Center for Asian Studies, Zhejiang University 2008: 187).

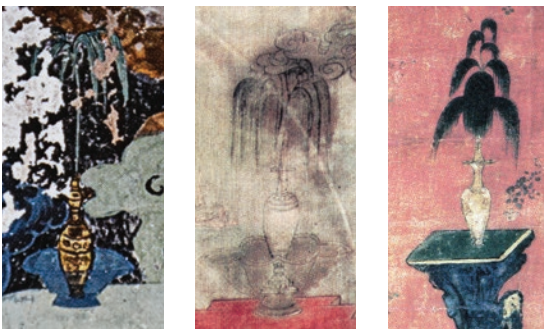

**Figures 16a-c.** Comparison of water bottle, plate, and willow branch, Western Xia: (a) Yulin cave (Dunhuang Research Institute 2012: 105); (b) Kara Khoto (Kungnip Chungang Pangmul-gwan 2010: 207); (c) Kara Khoto (Kungnip Chungang Pangmul-gwan 2010: 211).

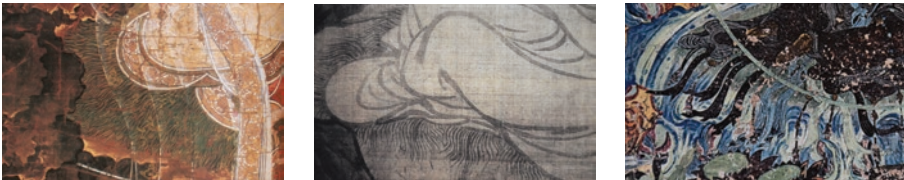

**Figures 17a-c.** Comparison of straw mat: (a) Song (Lin 1998: 146); (b) Koryŏ (Kikutake and Chŏng 1996: 201); (c) Western Xia (Dunhuang Research Institute 2012: 105).



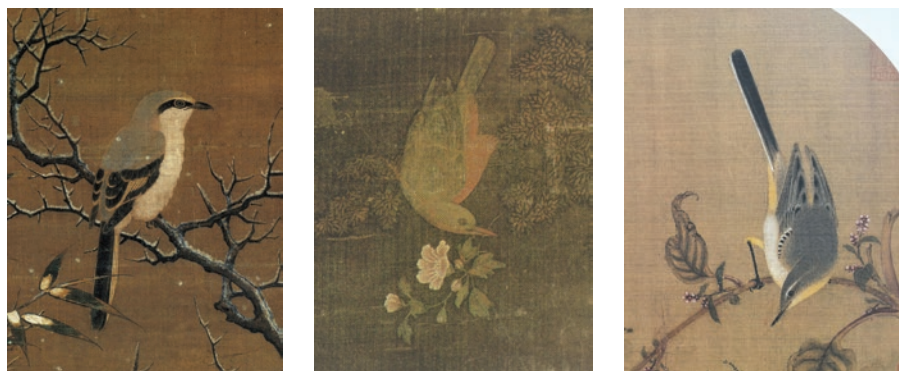

**Figures 18a–c.** Comparison of techniques of Song paintings and Koryō Water-Moon Avalokiteśvara: (a) Li Di 李迪 (1162–1224), *Snow Trees and Cold Birds* (Xueshu hanqin tu 雪樹寒禽圖), Southern Song, ink and color on silk, 52.8 cm×115.2 cm, Shanghai Museum, China (Research Center for Ancient Calligraphy and Painting, Zhejiang University 2008: 2-1-157); (b) *Water-Moon Avalokiteśvara*, Koryō, ink and color on silk, 229.7 cm×125.8 cm, Daitokuji, Japan (Yi Tongju 1981: 30); (c) *Polygonum Orientale Waterfowl* (Hongliao huiqian tu 紅蓼水禽圖), Song, ink and color on silk, 25.2 cm×26.8 cm, Palace Museum, Taiwan (Su 2018: 4).

Northern Song and Koryō, with many Chinese merchants traveling to the Korean peninsula almost every year, mainly for the purpose of conducting tributary trade. These activities also facilitated the exchange of paintings between Song and Koryō.<sup>16</sup> It is documented that Kwōn Chōk 權適 (1094–1147), a Koryō student who had studied in Song, returned home with a painting of Avalokiteśvara, which was a gift bestowed by Emperor Huizong 徽宗 (r. 1100–1126) of the Song dynasty (Ch'oe 2003: 208). Further, private merchants in Ningbo also possessed a large number of Buddhist paintings at this time. These two groups of people were the two major sources by which Koryō obtained Song Buddhist paintings.

However, the interactions between Koryō and the Southern Song gradually diminished.<sup>17</sup> The early Southern Song dynasty maintained a period of regular interaction with Koryō through the exchange of diplomatic visits and trade via maritime routes. Later, due to threats from the Jin 金 Empire (1115–1234), the two countries' official exchange activities ground to a halt, but their maritime trade continued. Between 1146 and 1170, when Koryō was ruled by Ŭijong 毅宗 (1127–73), an estimated 1,670 Southern Song merchants arrived in Koryō on twenty different occasions (Kim S. 2006: 63). In Koryō paintings of Water-Moon Avalokiteśvara, we can see techniques similar to those used in the Southern Song paintings (figs. 18a–c) (An 2009: 280; Chin 2010: 47).

These techniques were probably transmitted to Koryō through the trade in antiques among merchants (Yi H. 2019: 206–9). In fact, it was not until the late twelfth century that business activities of Song merchants began to decline in Koryō. The royal families of Koryō and Yuan also had frequent interactions as a result of alliances forged through marriage. Such interactions went beyond royal families and extended to envoys and literati. Exchanges of paintings between Yuan

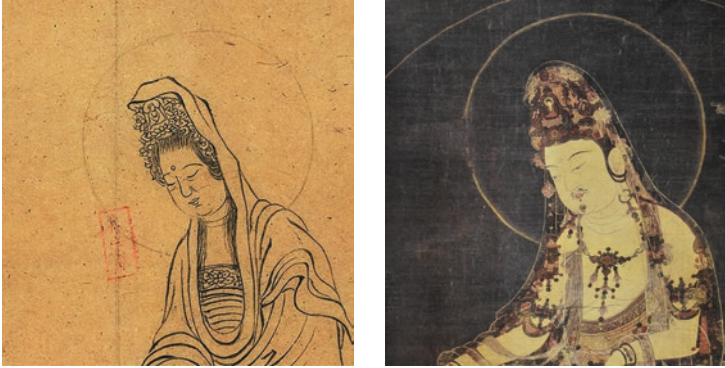

**Figures 19a–b.** Comparison of Zhao Mengfu's Avalokiteśvara and Koryō Water-Moon Avalokiteśvara: (a) Zhao Mengfu, *Heart Sutra*, Yuan, ink on paper, 22.8 cm×10.8 cm, Liaoning Museum, China (Yu X. 2014: 5); (b) *Water-Moon Avalokiteśvara*, Koryō, ink and color on silk, 109.5 cm×57.8 cm, Tanzan Jinja 談山神社, Japan (Kungnip Chungang Pangmulgwan 2010: 129).

and Koryō were most active when Koryō was ruled by King Ch'ungsōn 忠宣王 (1275–1325; r. 1298 and 1308–13), who spent most of his time in Yanjing 燕京 (the capital of Yuan) and governed the state through remote edicts (Kim S. 2006: 536–47). He even constructed the famous library Man'gwōndang 萬卷堂 in Yanjing to collect and store ancient Chinese books and paintings, where he was often joined by prominent local personalities for literary and artistic creations. King Ch'ungsōn once instructed Yi Chehyōn 李齊賢 (1287–1367) to come to Yanjing to be involved in the construction of Man'gwōndang. This assignment offered him an opportunity to socialize with many renowned artists of Yuan, such as Zhao Mengfu 趙孟頫 (1254–1322), Yao Sui 姚燧 (1239–1314), Yan Fu 閻復 (1236–1312), and Yuan Mingshan 元明善 (1269–1322) (Kim S. 1974).

One of the works held in the Liaoning Museum is a copy of the Heart Sutra in Zhao Mengfu's calligraphy. The painting of an Avalokiteśvara at the beginning of this artwork features a slightly head-down posture, head decoration, and robe similar to paintings from Koryō (figs. 19a–b). Other historical records show that interactions between Koryō and Song-Yuan monks and literati (Cho 2011: 123–40) provided another channel for ink-wash Water-Moon Avalokiteśvara paintings to reach Koryō. Considering the transfer of some elements of Song-Yuan ink-wash Water-Moon Avalokiteśvara paintings to Koryō images, my conclusion is that there were sufficient exchanges between the two countries to introduce Song-Yuan ink-wash Water-Moon Avalokiteśvara paintings to Koryō. The continued disparities in painting technique and style of Water-Moon Avalokiteśvara paintings were caused not by a lack of interaction but by the absence of a social environment in which the art could flourish in Koryō. Therefore, when creating Water-Moon Avalokiteśvara paintings, Koryō artists stuck with the Tang technique while selectively absorbing local elements of the Water-Moon Avalokiteśvara paintings of Song and Yuan.

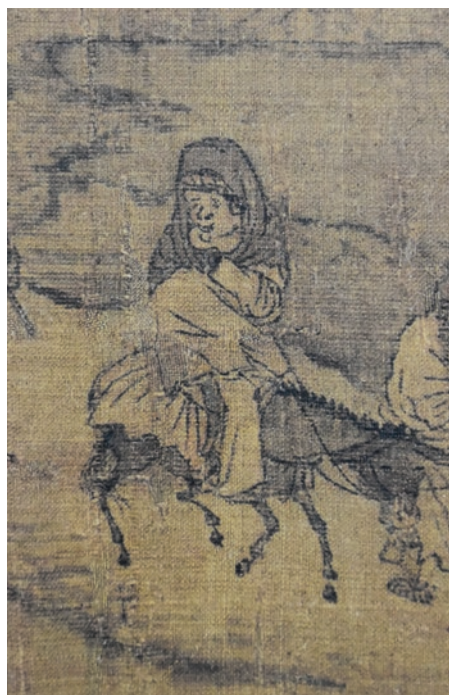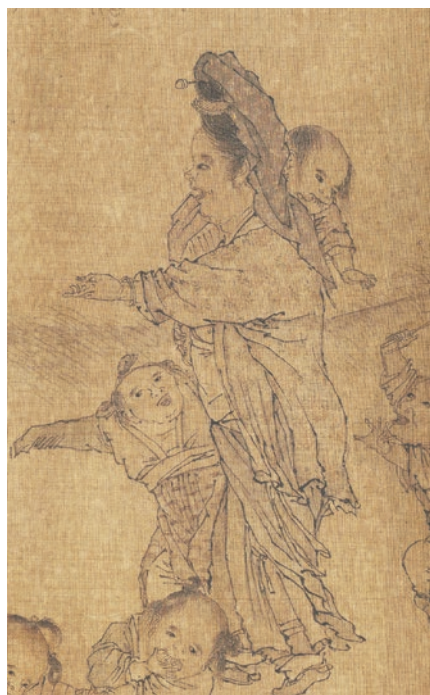

**Figure 20.** Zhang Zeduan 張擇端 (1085–1145), *Along the River during the Qingming Festival* (Qingming shanghetu 清明上河圖), Song, ink and color on silk, 24.8 cm×528.7 cm, Palace Museum, China (Research Center for Ancient Calligraphy and Painting, Zhejiang University 2008: 1-2-20).

**Figure 21.** Li Song 李嵩 (1166–1243), *Salesman Painting* (Huolang tu 貨郎圖), Song, ink and color on silk, 25.5 cm×70.0 cm, Palace Museum, China (Research Center for Ancient Calligraphy and Painting, Zhejiang University 2008: 1-4-114).

### **Water-Moon Avalokiteśvara's Robe and the Time Difference in Social Transformation to the Early Modern Period**

Although both Song-Yuan and Koryŏ artists painted the Water-Moon Avalokiteśvara wearing similar white robes, the robes were presented in different ways, as the origins and connotations of the white robe were different in the two countries. The White-Robed Avalokiteśvara of Koryŏ is that of the Esoteric Buddhist sutras. This White-Robed Avalokiteśvara was a Bodhisattva of India and different from the Water-Moon Avalokiteśvara created in China.

Prior to the Song dynasty, Avalokiteśvara had always been dressed colorfully. After the Song, Avalokiteśvara started to be presented as wearing a white robe, so Avalokiteśvara paintings were later commonly called White-Robed Avalokiteśvara. There are some research results concerning the origin of White-Robed Avalokiteśvara. The origin of Chinese White-Robed Avalokiteśvara is different from that of the White-Robed Avalokiteśvara of Esoteric Buddhism. Three fac-



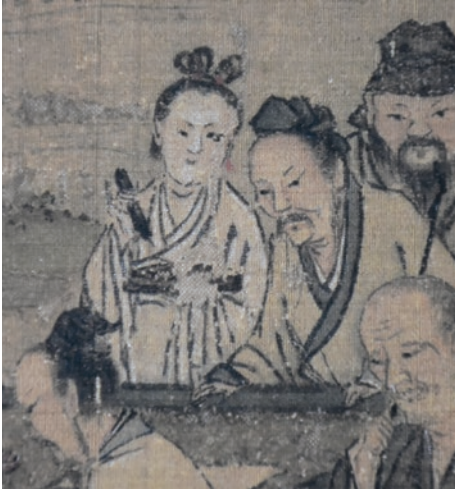

**Figure 22.** Ma Yuan 馬遠 (1140–1225), *Scholars Gathered in the West Garden* (Xiyuan yaji tu 西園雅集圖), Song, ink and color on silk, 18 cm×53 cm, Nelson Atkins Museum of Art, USA (Research Center for Ancient Calligraphy and Painting, Zhejiang University 2008: 6-5-130).

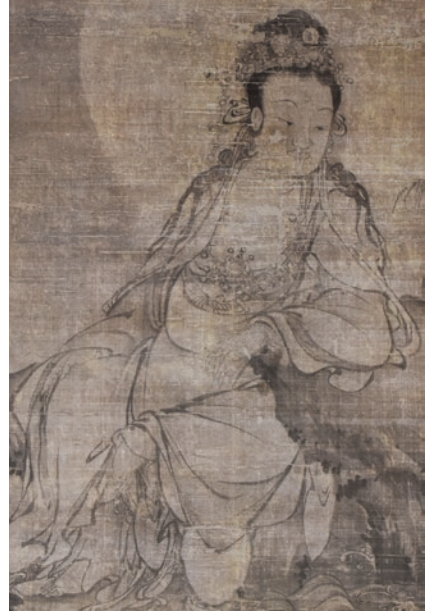

**Figure 23.** Yue Hu, *White-Robed Avalokiteśvara*, Song, ink on silk, 111.4 cm×48.6 cm, Okayama Prefectural Art Museum, Japan (Research Center for Ancient Calligraphy and Painting, Zhejiang University 2013: 4-2-20).

tors have been identified in the origins of Chinese White-Robed Avalokiteśvara. First, after the secularization of Buddhism, the robe worn by Avalokiteśvara was painted to resemble the clothing of women at the time (see figs. 20–23). Indeed, the secularization of Avalokiteśvara is depicted mainly as the feminization of Avalokiteśvara. In Song paintings, we can see that women’s clothing is quite similar to Avalokiteśvara’s white robe (Yu J. 2012: 258).

Second, the same robe can be observed in the paintings of a meditating Arhat or Bodhidharma (Chöng 2007: 222) (figs. 24–26). Among them, the earliest is a statue of seated meditation under a tree from the late fifth century found in Yungang 雲岡 (fig. 24). Third, the change was driven by scholar-officials who were lay Buddhists. Water-Moon Avalokiteśvara paintings show a striking resemblance to paintings of high-minded figures (*gaoshitu* 高士圖). Song and Yuan Water-Moon Avalokiteśvaras sit in a much more relaxed way with their hands resting on their knees, a posture much like that of figures seen in paintings of high-minded figures, and differ from other Bodhisattvas, which are usually portrayed in the full-lotus position (Yamamoto 1989; Meng and Yu 2011: 70). Most of these “high-minded figures” in Song and Yuan paintings were dressed in white (figs. 27–29).

Qian Mu mentioned that “after the Song dynasty, it was a purely civilian society. Those who rose to the top of the political class came from the class of ‘white robed scholars (*baiyixiucai* 白衣秀才)’ that is, from a humble background, with few mem-



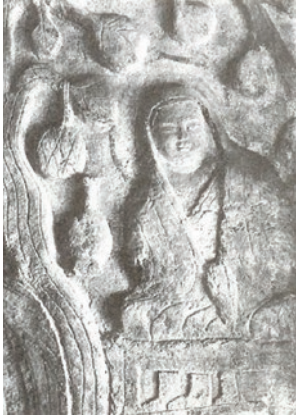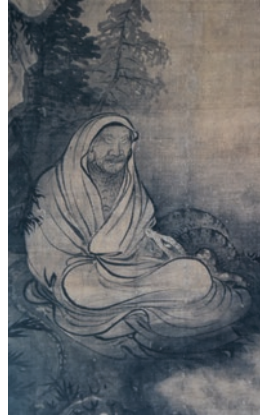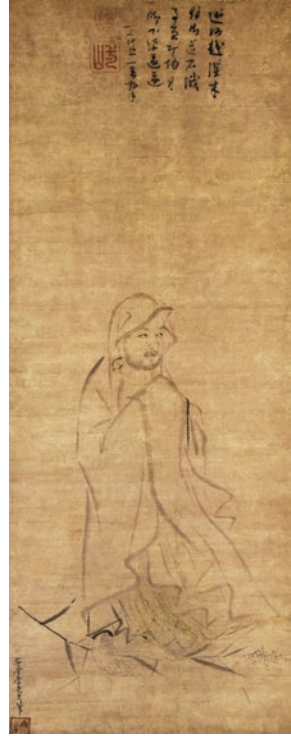

**Figure 24.** *Buddhist Monk Sitting under a Tree* (Shuxia chanding biqiuxiang 樹下禪定比丘坐像), Sui 隋 dynasty (ca. 600 CE), Yungang 雲岡 Cave No. 7 in Datong 大同, Shanxi 山西 Province, China (Chǒng 2007: 19).

**Figure 25.** *Mu Xi, Arhat* (Luohan tu 羅漢圖), Song, ink on silk, 105.9 cm×52.4 cm, Seikadō Bunko 靜嘉堂文庫 Museum of Art, Japan (Research Center for Ancient Calligraphy and Painting, Zhejiang University 2008: 7-2-136).

**Figure 26.** *Bodhidharma* (Damo tu 達摩圖), Song, ink on silk, Freer Gallery of Art, USA (Research Center for Ancient Calligraphy and Painting, Zhejiang University 2013: 5-1-30).

bers from the feudal aristocracy or nobility” (Qian Mu 1974: 2). In Song paintings we can see the lifestyle of scholar-officials such as, for example, Su Dongpo (fig. 30).<sup>18</sup> I contend that the white robe is a reflection of the popularization and secularization of Buddhism in Song society, the culture of which favored plain elegance, and where white was seen as a symbol of ordinary people or scholar-officials of humble birth.

Avalokiteśvara is depicted as a prince in the Indian scriptures, but the Song dynasty Avalokiteśvara in China was not a prince but a common woman (Yu J. 2012: 406–48). Avalokiteśvara wearing the white robe was an Avalokiteśvara who had become much more approachable in the eyes of commoners. Koryō accepted in part the style of the white robe from the Song-Yuan ink-wash paintings of Water-Moon Avalokiteśvara (figs. 1–2), but significant differences can still be noted in the white robes; these differences arose because they served different purposes.<sup>19</sup> The Song-Yuan white robe worn by Water-Moon Avalokiteśvara is mostly made of ordinary cloth, whereas the Koryō white robe is usually made of white chiffon with exquisite lines and adorned with gold thread (Sim 2012: 24). In other words, the white robe of Koryō Water-Moon Avalokiteśvara was not painted to show simplicity but to display resplendence. And the Koryō Avalokiteśvara was not the portrait of an ordinary woman but of a worshipful prince.<sup>20</sup> The clothing of Koryō Water-Moon Avalokiteśvaras is similar to the clothing of a Zhou Fang painting from the Tang dynasty. Both portray aristocratic clothing (figs. 31a–b).<sup>21</sup> In Esoteric Buddhist sutras, Avalokiteś-

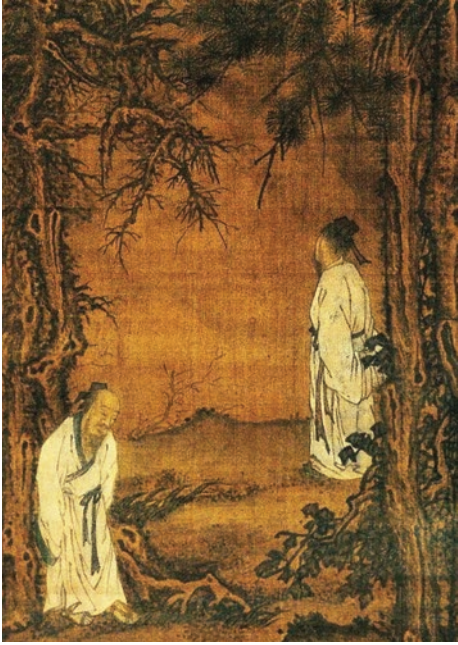

**Figure 27.** Li Tang 李唐 (1066–1150), *Scholars in the Forest* (Linquan gaoyi 林泉高逸), Song, ink and color on silk, 134 cm×64 cm, private collection (Pei 2010: 23).

**Figure 28.** Liang Kai, *Story of Eight Eminent Monks* (Ba gaoseng gushi tu 八高僧故事圖), Song, ink and color on silk, 24.6 cm ×64.0 cm, Shanghai, Museum, China (Research Center for Ancient Calligraphy and Painting, Zhejiang University 2008: 2-2-56).

**Figure 29.** *Drawing of Pine Shade and Cudgel* (Songyin cezhang tu 松蔭策杖圖), Yuan, ink and color on silk, 28 cm×28.7 cm, Palace Museum, China (Research Center for Ancient Calligraphy and Painting, Zhejiang University 2008: 1-7-34).

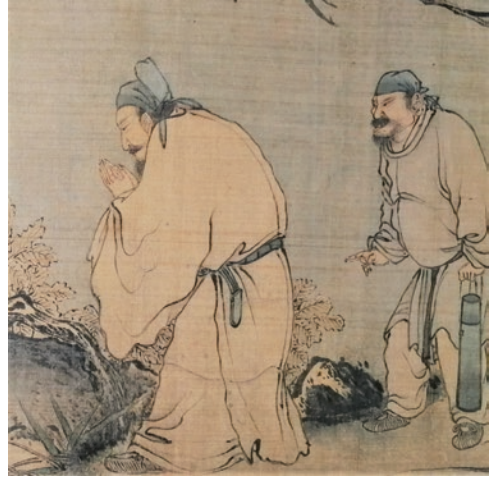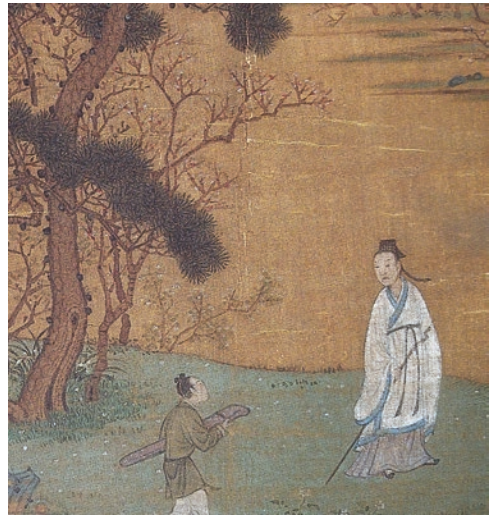

vara's white robe is described as being made of chiffon, which was the same as that worn by Koryŏ Water-Moon Avalokiteśvara.<sup>22</sup> The white robe of Koryŏ Water-Moon Avalokiteśvara is characterized by transparency, which is shown according to the image of the Esoteric Buddhist sutras (Chin 2010: 131).<sup>23</sup> During the Koryŏ dynasty, Buddhist paintings were strongly shaped by Esoteric Buddhism because of the close ties between Koryŏ royal families and their Yuan counterparts, the latter of which practiced Esoteric Buddhism (Chin 2010: 158). The white veil of Koryŏ Water-Moon Avalokiteśvara is identical to the veil of Esoteric Buddhism Avalokiteśvara paintings (figs. 33a–b); see, for example, the Thousand-Handed Avalokiteśvara of Song and Yuan Ningbo Buddhist paintings (fig. 32).

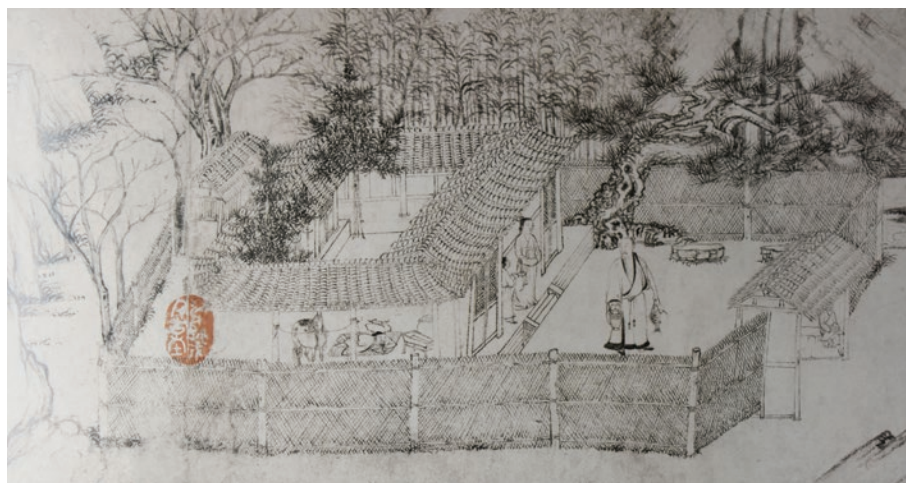

**Figure 30.** Qiao Zhongchang 喬仲常 (12th c.), *Painting of Second Ode to the Red Cliffs* (Hou chibi fu tu 後赤壁賦圖), Song, ink on silk, 29.3 cm×560.3 cm, Nelson Atkins Museum of Art, USA (Research Center for Ancient Calligraphy and Painting, Zhejiang University 2008: 6-5-46).

In the Chosŏn dynasty, however, the magnificent and transparent white robe typical of Koryŏ disappeared and was displaced by the Chinese-style simple and plain white robe (figs. 34–36). This is because Chosŏn, like Song and Yuan, had become a society of ordinary people where Zen gained dominance among Buddhist believers. As a result, Song- and Yuan-style ink-wash Water-Moon Avalokiteśvara paintings became dominant during the Chosŏn dynasty.

In addition, the Chosŏn dynasty's Water-Moon Avalokiteśvara paintings were now much more similar to the Water-Moon Avalokiteśvara paintings in China. The differences in style previously seen between the Koryŏ Water-Moon Avalokiteśvara and Song and Yuan Water-Moon Avalokiteśvara had largely disappeared (figs. 37a–c).

### Conclusion

The painting in figure 38 is regarded as heralding the beginning of a literati painting trend in Chosŏn Korea. Some scholars believe it to have been influenced by the Chinese ink-wash Water-Moon Avalokiteśvara paintings (Hong 1985: 101).

Water-Moon Avalokiteśvara is a good example of the localization of Buddhism in China, while Koryŏ Water-Moon Avalokiteśvara paintings represent the adapted version of Chinese Water-Moon Avalokiteśvara after it spread to Koryŏ. Both Yuan and Koryŏ Water-Moon Avalokiteśvara images owe their origins to Zhou Fang, but they followed two divergent paths due to the different social and cultural environments of the two countries. Social transformation and the secularization of Buddhism during the Tang and Song dynasties gave birth to ink-wash Water-Moon Avalokiteśvara paintings, while the aristocratic Koryŏ society retained Zhou Fang's heavily colored technique featuring magnificence and solemnity. Although the Koryŏ painting techniques of Water-Moon Avalokiteśvara



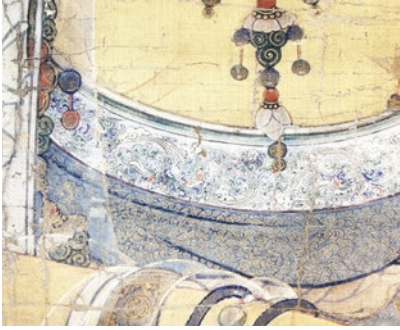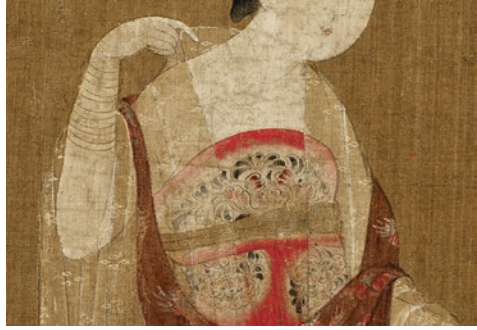

**Figures 31a-b.** Comparison of costumes in Tang and Koryŏ Water-Moon Avalokiteśvara: (a) *Koryŏ Water-Moon Avalokiteśvara*, Kagami Jinja, Japan (Kikutake and Chŏng 1996: 201); (b) *Lady Holding a Flower*, Liaoning Provincial Museum, China (Shanghai Calligraphy and Painting Publishing House 2003: 4).

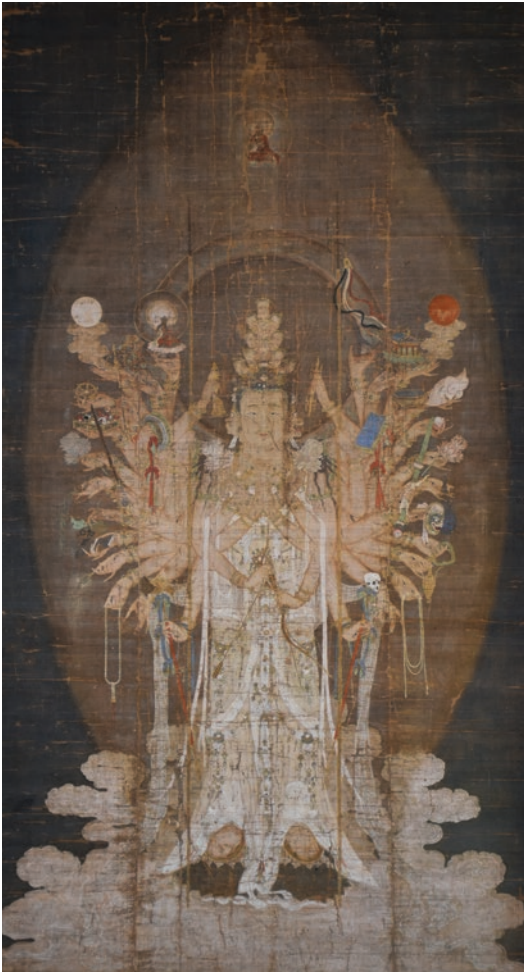

**Figure 32.** *Thousand-Handed Avalokiteśvara*, Song, ink and color on silk, 190.4 cm × 104.6 cm, Eihoji 永保寺, Japan (Research Center for Ancient Calligraphy and Painting, Zhejiang University 2008: 7-2-171).



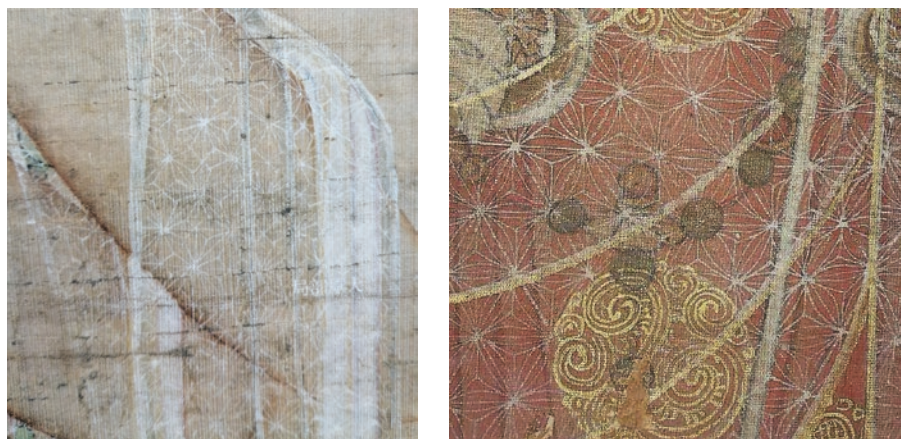

**Figures 33a–b.** Comparison of cloth of Thousand-Handed Avalokiteśvara and Koryŏ Water-Moon Avalokiteśvara: (a) detail of *Thousand-Handed Avalokiteśvara* of Song (Research Center for Ancient Calligraphy and Painting, Zhejiang University 2008: 7-2-171); (b) detail of *Water-Moon Avalokiteśvara* of Koryŏ (Kikutake and Chŏng 1996: 204).

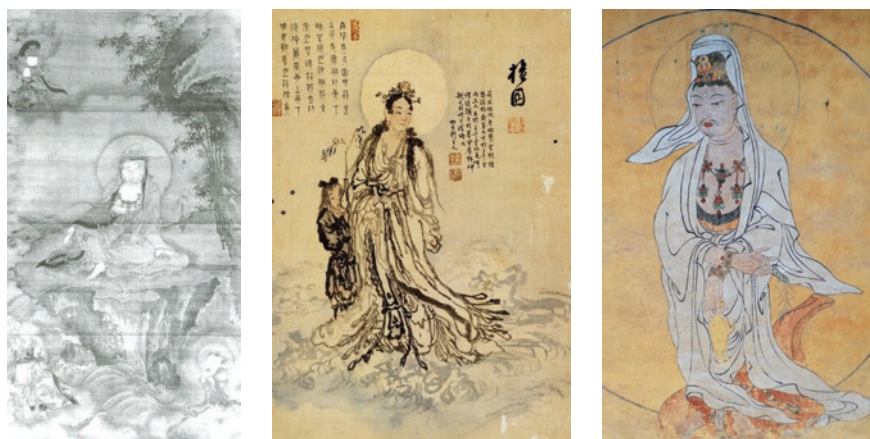

**Figure 34.** *Water-Moon Avalokiteśvara*, completed in 15th c., ink and color on silk, 144.3 cm×63.7 cm, Kōfuku gokoku zenji 廣福護國禪寺, Japan (Kim R. 2011: 247).

**Figure 35.** Kim Hongdo 金弘道 (1745–?), *The South Sea Avalokiteśvara*, Chosŏn, ink and color on silk, 30.6 cm×20.6 cm, Kansong Museum, Korea (Kungnip Chungang Pangmulgwan 1995: 200).

**Figure 36.** *Avalokiteśvara*, Chosŏn, ink and color on soil wall, Muwi Temple 無爲寺, Korea (Kim R. 2011: 290).

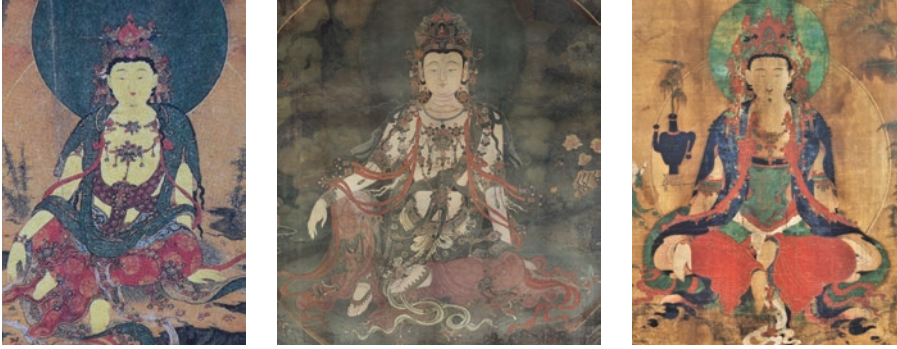

**Figures 37a–c.** Comparison of Chosŏn and Ming Water-Moon Avalokiteśvara: (a) *Water-Moon Avalokiteśvara*, completed in 1550, by Yi Chasil 李自實 (16th c.), Chosŏn, ink and color on silk, 235 cm×135 cm, Chion'in 智溫院, Japan (Kim Rina 2011: 298); (b) *Water-Moon Avalokiteśvara*, completed in 1439, Ming, ink and color on wall, 450 cm×450 cm, Fahai Temple 法海寺, China (Heritage Press 文物出版社 2019: 1–3); (c) *Water-Moon Avalokiteśvara*, completed in 1730, by Ŭigyŏm 義謙 (18th c.), Chosŏn, ink and color on silk, 143.7 cm×105.5 cm, Museum of Korean Buddhist Art, Korea (Kim R. 2011: 232).

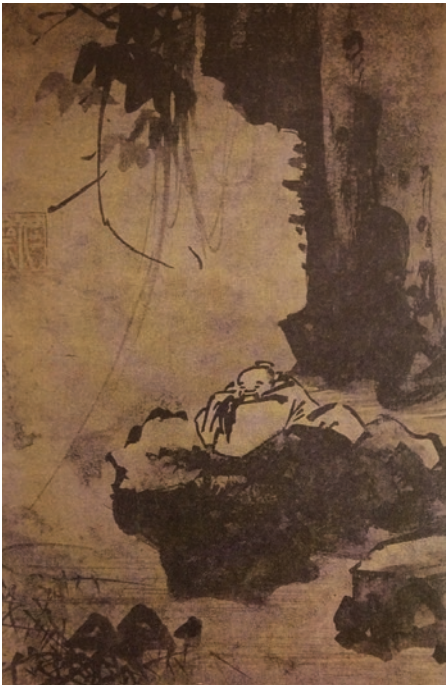

**Figure 38.** Kang Hŭian 姜希顔 (1417–64), *Scholar-Official Looking at Water* (*Kosa kwansu-do* 高士觀水圖), Chosŏn, ink on paper, 23 cm×16 cm, National Museum of Korea, Korea (Kang 2011: 80).

differed markedly from those of the Song and Yuan, Koryŏ nonetheless absorbed some new elements of their ink-wash paintings, including Avalokiteśvara's white robe, due to their frequent bilateral interactions; still, there were differences between Yuan and Koryŏ in the meaning of the white robes. Thus, Koryŏ Water-Moon Avalokiteśvara represents a selective adaptation of Chinese Water-Moon Avalokiteśvara, and its unique imagery is a result of the difference in timing in the social transformations of China and Korea.

In the final analysis, the time difference between China and Korea in the transition to the early modern period was caused by the time difference in the ideological environment. Artistic style can encode social values. What does not follow is the notion that different values correspond to a stable and distinct culture (Powers 2013: 313). Any artistic image is simply a manifestation of ideas and concepts in a particular society and period of history. Ideology is the substance, whereas art is the form. With any change in ideology will naturally come a change in the form of art, as people cannot live in isolation from their historical environment and current ideology. Hence, artistic imagery should be examined in the broader context of social and intellectual history. By examining the evolution of the image of Water-Moon Avalokiteśvara, we can conclude that the time difference between the Chinese and Korean transitions to the early modern period was a common cultural phenomenon, which, to some extent, also created diverse art forms.

Hyun Joo Lee is a lecturer at Zhejiang University, where she teaches Korean art history. She received her PhD from the Department of Art History, Zhejiang University, in 2020. She is interested in cultural interchanges in East Asian painting. Her most recent publications include articles in *Han'gukhaknonjip* and *Kangjwa misulsa*.

## NOTES

1. Bai Juyi 白居易 (772–846) lived in seclusion in Xiangshan 香山, Longmen 龍門, after his political defeats. His praise of the Bodhisattva in a Water-Moon Avalokiteśvara painting reflects his indifference and negative views. Thus, Wang Huimin argues there are profound social reasons for the emergence and spread of Water-Moon Avalokiteśvara (Wang H. 1987: 37).

2. It is recorded that there were ink-wash paintings called Water-Moon Avalokiteśvara during the Koryŏ dynasty, but no such works have survived. One Zen-style Water-Moon Avalokiteśvara painting has survived, but it is not an ink-wash painting (Yi H. 2016: 221–23).

3. “In China aristocratic politics declined during the transitional period from the end of the Tang dynasty to the Five Dynasties and was replaced by an autocratic monarchy. As a result of the aristocracy losing power, the monarch's position grew closer to that of the people. This system developed gradually after the Song dynasty. Although China did not recognize the people's right to participate in politics, after the elimination of the aristocracy, the monarch and the people directly opposed each other, and this was certainly the case after entering the politics of early modernity. Compared with the way in which official positions were off-limits to the

common people in the era of autocratic monarchy, equal opportunity was allowed. Literature used to be the province of the nobility, but subsequently became the property of the common people” (Naitō 1992: 10).

4. From an intellectual historical perspective, the end of the Middle Ages results from the replacement of Buddhism by Neo-Confucianism as the state religion, and with this change came also a shift in social structure (Hō 1994: 62).

5. Those who came from family backgrounds like that of Yi Ŭimin 李義旼 (?–1196) were occasionally appointed as low-ranking military officials, but most military positions were filled by men from powerful or wealthy backgrounds.

6. “貞元末, 新羅國有人於江淮以善價收市數十卷, 持往彼國.”

7. To investigate the pigment composition of Koryō Water-Moon Avalokiteśvara paintings, modern scientific methods were used: the results of X-ray or ultraviolet radiation on the original painting were analyzed to determine the composition, and the pigments remaining on the paper on the back of the painting were analyzed during the repair process (Yi T. 1997: 46).

8. Matsumoto Eiichi was the first to claim that Zhou Fang was the father of Water-Moon Avalokiteśvara paintings (Matsumoto 1937: 348). His opinion was based on the records in *Lidaiminghua ji*, vol. 3: “He is the father of Water-Moon Avalokiteśvara paintings” (Zhang 1985: 323). But some scholars reject this view.

9. Wang Wei, styled Mojie居士, was proficient in poetry, calligraphy, painting, and music. Later generations regarded him as the ancestor of the Southern School of landscape painting (a sort of ink-wash painting). Su Dongpo 蘇東坡 (1037–1101) commented: “there is a picture in the poem of Mo Jie 摩詰, and there is a poem in the picture when you look at the painting of Mo Jie (味摩詰之詩, 詩中有畫; 觀摩詰之畫, 畫中有詩)” (Su 2020: 166).

10. “Koryō Avalokiteśvara paintings look expert and owe their origins to Yuchi Yiseng 尉遲乙僧 [seventh–eighth centuries]. Their paintings later became extremely exquisite” (Tang 2009: 469).

11. Bai Juyi 白居易 (772–846), a renowned poet of the Tang dynasty, once expressed his feelings in the poem “Appreciating the Paintings of Water-Moon Avalokiteśvara” as follows: “Upon the pure water, between the white light, my eyes alight upon the image, and all turns empty. Your disciple Juyi, determined to convert. Through my ups and downs, you shall be my master (淨淥水上, 虛白光中, 壹睹其相, 萬緣皆空。弟子居易, 誓心皈依, 生生劫劫, 長為我師)” (Bai 1979: 888).

12. “Avalokiteśvara” was called “Guanshiyin” 觀世音 to emphasize his mercifulness when the Indian Buddhist monk Kumārajīva translated the Heart Sutra and *Mahāprajñā-pāramitā sūtra* (Chōn 2015: 4).

13. Yi Kyōnghūi believes that this change comes from the idea of “provide a willow branch and pure water for Avalokiteśvara” as described in the *Saḍakṣaravidyāmantra sūtra* 六字神咒王經 (Yi K. 1987: 21).

14. Military officials started a successful military revolt that resulted in the deposition of Ŭijong 毅宗 (1127–73) and the appointment of Myōngjong 明宗 (1131–1202) as well as the killing of many civil officials. Koryō was in its infancy when Yi Ŭibang 李義方 (?–1174), Chōng Chungbu 鄭仲夫 (1106–79), and Yi Ŭimin 李義旼 (?–1196) ruled; in its maturity when Ch'oe Ch'unghōn 崔忠獻 (1149–1219) and his following three generations ruled; and in its decline thereafter (Pyōn 1978: 87–88).

15. “When seeing the Water-Moon Avalokiteśvara painting that Hwan Changno 幻長老 (12th–13th c.) asked an artist to paint, I was full of praise, saying . . .” (Yi K. 1985: 201). There are records showing the existence of Water-Moon Avalokiteśvara paintings during the Koryō dynasty, but none of the works have survived.



16. During the 260 years between the Koryŏ kings Hyŏnjong 顯宗 (992–1031) and Ch'ungyŏl 忠烈 (1009–1278), nearly five thousand Chinese merchants came to Koryŏ on more than 210 occasions (Kim S. 1954: 65).

17. According to historical records, eighty-seven delegations of Northern Song merchants and thirty-one delegations of Southern Song merchants arrived in Koryŏ (Kim W. 2004: 258).

18. The painting is a landscape figure work, divided into several segments and recorded on the screen according to the narrative sequence of “Second Ode to the Red Cliffs” (Houchibi fu tu 後赤壁賦圖) by Su Dongpo.

19. Although scholars note the association between Koryŏ Water-Moon Avalokiteśvara and Western Xia Avalokiteśvara because of the white veil, it can be seen that the form of the white robe is more similar to Water-Moon Avalokiteśvara images in ink.

20. In the Indian scriptures, Avalokiteśvara is described as a prince. In the Koryŏ Water-Moon Avalokiteśvara paintings, Avalokiteśvara has a beard and is dressed in colorful costumes, which can be seen as princely. Song-Yuan Water-Moon Avalokiteśvara was portrayed as a woman dressed as the common people, which was influenced by the secularization of Avalokiteśvara, a feature not seen in Koryŏ Water-Moon Avalokiteśvara.

21. According to vol. 68 of *Baibao Kouchao* 白寶口抄, the image of Avalokiteśvara dressed in a translucent white robe has its origins in the Tang dynasty (Chin 2010: 59). The clothing of Koryŏ Water-Moon Avalokiteśvara was similar to clothing popular in the Tang dynasty. This kind of light outer dress or robe has a gorgeous pattern and is tied under the chest.

22. Bu Kong translated *Sheng guan zizai pusaxin zhenyan yujia guanxing yigui* 聖觀自在菩薩心真言瑜伽觀行儀軌 (Sutra of the Mind of the Bodhisattva of the Holy View of Freedom and the Practice of Yoga). In this sutra the image of the Avalokiteśvara is described as follows: “Crossed legs, golden body, round light behind, wearing a chiffon veil and a red skirt.”

23. Pan Liangwen divides White-Robed Avalokiteśvara style into two systems. One is developed in the esoteric system, the other in Zen painting (Pan 2000: 89). From the perspective of Pan Liangwen's distinction and the content of Guanyin belief, the White-Robed Avalokiteśvara in Koryŏ originated from the esoteric system (Chin 2010: 107).

## REFERENCES

### Primary Sources

- Bai Juyi 白居易. 1979. *Bai Juyi ji* 白居易集 [Collected works of Bai Juyi]. Translated by Gu Xuejie 顾学颉. Beijing: Zhonghua Shuju.
- Ch'oe Cha 崔滋. 2003. *Pohan chip* 補閑集 [Collected works of Ch'oe Cha], vol. 2. Translated by Ku Inhwon. Seoul: Sinwŏn Munhwasa.
- Su Shi 蘇軾. 2020. *Dongpo Tiba* 東坡提拔 [Dongpo's promotion]. In *Yiwen Congkan I-003* 藝文叢刊第一輯003, checking by Bai Shi 白石. Hangzhou: Zhejiang Renmin Meishu Chubanshe.
- Tang Hou 湯垕. 2009. *Gujinhua jian* 古今畫鑒 [Appreciation of paintings ancient and present]. In *Zhongguo shuhua quanshu III* 中國書畫全書·三 [Encyclopedia of Chinese paintings and works of calligraphy III], edited by Lu Fusheng 盧輔聖. Shanghai: Shanghai Shuhua Chubanshe.
- Xu Jing 徐兢. 1985. *Xuanhe fengshi Gaoli tujing* 宣和奉使高麗圖經 [Illustrated account of the Xuanhe embassy to Koryŏ]. Beijing: Zhonghua Shuju.

- Yi Kyubo 李奎報. 1985. *Tongguk Yi Sangguk chip* 東國李相國集 [Collected works of Yi Kyubo], postset 11 *kwön*. Seoul: Minjok Munhwa Ch'ujinhoe.
- Zhang Yanyuan 张颜元. 1985. *Lidai minghua ji* 歷代名畫記 [Annals of famous painters of successive dynasties], 10 *juan*. Beijing: Zhonghua Shuju.
- Zhu Jingxuan 朱景玄. 1985. *Tangchao minghualu* 唐朝名畫錄 [Celebrated painters of the Tang dynasty]. Sichuan: Sichuan Meishu Press.

## Secondary Sources

- An Hwijun 안휘준. 2009. *Han'guk hoehwasa yön'gu* 한국회화사연구 [A study of the history of Korean painting]. Seoul: Sigongsa.
- Center for Asian Studies, Zhejiang University 浙江大学亚洲研究中心, ed. 2017. *Gaolihua quanji* 高麗畫全集 [Complete Koryö paintings]. Hangzhou: Zhejiang University Press.
- Ch'ae Sangsik 채상식. 1979. "Koryö hugi Ch'önt'aejong üi paengnyönsa kyölsa" 고려 후기 천태종의 백련사 결사 [Formation of the Ch'önt'aejong White Lotus Society during the Late Koryö dynasty]. *Han'guksaron* 5: 107–196.
- Chi Miryöng 지미령. 2014. "Koryö Suwölkwanümdo üi taenamü tosang e kwanhan koch'al" 고려수월관음도의 대나무 도상에 관한 고찰 [A study on the images of the Koryö Water-Moon Avalokiteśvara]. *Pulgyomuneyön'gu* 3: 9–44.
- Chin Myöngghwa [Chen Minghua] 진명화. 2010. "Koryö sidae kwanü sinang kwa pulhwa üi tosang yön'gu" 고려시대 관음 신앙과 불화의 도상 연구 [A study of Avalokiteśvara and Buddhist paintings of the Koryö dynasty]. PhD diss., Yonsei University.
- Cho Yöngnok 조영록. 2011. *Tong asia pulgyo kyoryusa yön'gu* 동아시아 불교 교류사 연구 [A study of the history of Buddhist exchange in East Asia]. Seoul: Tongguk University Press.
- Chön Hönjin 전헌진. 2015. *Taesüng üi pulgyo sasang e sö pon Chosön hugi kwanü posalto yön'gu* 대승의 불교사상에서 본 조선 후기 관음보살도 연구 [A study of Avalokiteśvara paintings of the Late Chosön dynasty from the perspective of Mahāyāna Buddhism]. MA thesis, Tongguk University.
- Ch'oe Pyöngghön 최병훈. 1983. "Koryö chunggi Yi Chahyön üi Sön kwa kösapulgyo üi söngkyök" 고려 중기 이자현의 선과 거사불교의 성격 [Character of Yi Chahyön's Zen and lay Buddhism during the mid-Koryö dynasty]. In *Kim Ch'ölchun paksa hwagap kinyöm sahak nonch'ong* 김철준 박사 화갑 기념 사학논총 [Commemorative theses in honor of the sixtieth birthday of Dr. Kim Ch'ölchun], edited by Kim Ch'ölchun Paksa Hwagap Kinyöm Sahak Nonch'ong Kanhaeng Ch'ujin Wiwönhoe 김철준 박사 화갑 기념 사학 논총 간행추진위원회, 941–60. Seoul: Chisik Sanöpsa.
- Chöng Ut'aek 정우택. 2007. "Koryösidae Sönjonggye Suwölkwanümdo" 고려시대 선종계 수월관음도 [Zen Buddhism-themed Water-Moon Avalokiteśvara paintings of the Koryö dynasty]. In *Sigakmunhwa üi chönt'ong kwa ihae: Kim Rina kyosu chöngnyön t'oeim kinyöm misulsa nonmunjip* 시각 문화의 전통과 이해: 김리나 교수 정년 퇴임 기념 미술사 논문집 [Tradition and interpretation of visual culture: Art history festschrift in honor of professor Kim Rina], edited by Kim Rina 김리나 et al., 209–22. Seoul: Yegyöng.
- Chöng Ut'aek 정우택. 2011. "Koryö üi chungguk pulhwa sönt'aek kwa pyönyong" 고려의 중국 불화 선택과 변용 [Selection and transformation of Chinese Buddhist paintings in Koryö]. *Misulsayön'gu* 25: 109–136.
- Dunhuang Research Institute 敦煌研究院. 2012. *Anxi Yulinku* 安西榆林窟 [Anxi Yulin cave]. Beijing: Heritage Press 文物出版社.
- Gong Mingyu 龚明玉. 2009. "Yi luohanxiang wei lie laitán wudai zhihou zhongguo fojiao fazhan zhiliubian" 以罗汉像为例来谈五代之后中国佛画发展之流变 [Arhat images as an example

- for discussing developments and changes in Chinese Buddhist paintings after the Five dynasties]. *Yishutansuo* 23:15–19.
- Heritage Press 文物出版社. 2019. *Fahaisibihua (1) 法海寺壁画(1)* [Frescoes of Fahai Temple (1)]. Beijing: Heritage Press.
- Hö Hüngsik 허흥식. 1994. *Han'guk chungse pulgyosa yŏn'gu* 한국 중세불교사 연구 [History of Korean medieval Buddhism]. Seoul: Ilchogak.
- Hong Sŏnp'yo 홍선표. 1985. “Injae Kang Hüianüi 'Kosakwansu-do' yŏn'gu” 인제 강희안의 고사관수도 연구 [A study on the “Painting of a Scholar-Official Looking at Water” of Injae Kang Hüian]. *Chöngsin munhwa yŏn'gu* 27: 93–106.
- Huang Ge 黄戈. 2009. “Gaoli yu zhongguo huihua jiaoliu shulüe” 高丽与中国绘画交流述略 [Summary of painting exchanges between Koryŏ and China]. *Beifangwenwu* 4: 81–87.
- Jin Weinuo 金维诺. 1957. “Zhou Fang” 周昉. *Wenwu cankao ziliao* 1: 34–38.
- Kang Haengwŏn 강행원. 2011. *Han'guk Muninhwa* 한국문인화 [Korean literati painting]. Seoul: Han'gil At'ü.
- Kikutake Jun'ichi 菊竹淳一. 1981. “Kōrai butsuga ni miru Chūgoku to Nihon” 高麗佛畫にみる中國と日本 [China and Japan seen in Koryŏ Buddhist paintings]. In *Kōrai butsuga* 高麗佛畫 [Koryŏ Buddhist painting], edited by Kikutake Jun'ichi 菊竹淳一 et al., 9–16. Tokyo: Asahi Shinbunsha.
- Kikutake Jun'ichi 菊竹淳一 and Chöng U'taek. 1996. *Koryösidae üi pulhwa* [The Buddhist paintings of Koryŏ dynasty]. Seoul: Sigongsa.
- Kim Chönghui 김정희. 2001. “Koryŏ wangsil üi pulhwa chejak kwa wangsil palwŏn pulhwa üi yŏn'gu” 고려 왕실의 불화 제작과 왕실 발원 불화의 연구 [A study of Buddhist paintings sponsored by the royal family of the Koryŏ dynasty]. *Kangjiwa misulsa* 17:127–53.
- Kim Rina 김리나. 2011. *Han'guk pulgyo misulsa* 한국 불교 미술사 [History of Buddhist art in Korea]. Seoul: Mijinsa.
- Kim Sanggi 김상기. 1954. *Tongbang munhwa kyoryusa non'go* 동방문화교류사논고 [A study of the history of oriental cultural exchange]. Seoul: Üryu Munhwasa.
- Kim Sanggi 김상기. 1974. “Yi Chehyŏn üi chaewŏn saengae e taehayŏ” 이체현의 재원 생애에 대하여 [A study of Yi Chehyŏn's life in the Yuan]. In *Tongbangsa nonch'ong* 동방사논총, edited by Kim Sanggi, 220–53. Seoul: Seoul University Press.
- Kim Sanggi 김상기. 2006. *Koryŏ sidaesa* 고려시대사 [History of the Koryŏ dynasty]. Seoul: Seoul University Press.
- Kim Wihyŏn 김위현. 2004. *Koryŏ sidae taeye kwan'gyesa yŏn'gu* 고려시대 대외 관계사 연구 [History of Koryŏ diplomacy]. P'aju: Kyöngin Munhwasa.
- Kungnip Chungang Pangmulgwan 국립중앙박물관, ed. 1995. *Tanwŏn Kim Hongdo t'ansin 250chunyŏn kinyŏm t'ükpyŏlchŏn* 단원 김홍도 탄신 250주년 기념 특별전 [Special exhibition on the occasion of the 250th anniversary of Tanwŏn Kim Hongdo]. Seoul: Samsung Munhwa Chaedan.
- Kungnip Chungang Pangmulgwan 국립중앙박물관, ed. 2010. *Koryŏ pulhwa taejŏn* 고려불화대전 [Exhibition of Koryŏ Buddhist painting]. Seoul: National Museum of Korea.
- Li Daoyuan 李道媛. 2014. “Cong 'er Li' dao 'er Zhao': Chudu Tang-Song shiqi de qinglü shanshui” 从‘二李’到‘二赵’—初读唐宋时期的青绿山水 [From the “two Lis” to the “two Zhaos”: A first reading of the blue-green landscapes of the Tang and Song dynasties]. *Meishujie* 4:67.
- Li Lì'an 李利安. 2008. *Gudai guanyin xinyang de yanbian jiqi xiang zhongguo de chuanbo* 古代观音信仰的演变及其向中国的传播 [Origin and spread of ancient Avalokiteśvara-centered Buddhism]. Beijing: Zongjiao Wenhua Chubanshe.

- Li Ling 李翎. 2002. "Shuiyue guanyin yu zangchuan fojiao guanyin xiang zhi guanxi" 水月观音与藏传佛教观音像之关系 [The relationship between Water-Moon Avalokiteśvara and Tibetan Buddhist Avalokiteśvara images]. *Meishushi yanjiu* 11: 50–53.
- Li Xuanzhou [Yi Hyōnju] 李炫周. 2016. "Gaoli shuiyue guanyin tu de huafa yanjiu" 高丽水月观音图的画法研究 [A study of the artistic techniques of the Koryō Water-Moon Avalokiteśvara]. PhD diss., Zhejiang University.
- Li Xuanzhou [Yi Hyōnju] 李炫周. 2019. "Gaoli shuiyue guanyin tu Zhong tangdai huafa de yingxiang ji yuanyin" 高丽水月观音图中唐代画法的影晌及原因 [The influence of and reasons for Tang dynasty painting techniques in images of Koryō Water-Moon Avalokiteśvara]. In *Zhong-Han shehui yu haiyang jiaoliu yanjiu* 中韩社会与海洋交流研究 [A study of the social and maritime exchanges between China and Korea], edited by Qian Yong 千勇 and Jin Jianren 金健人, 16–32. Beijing: Minzhu.
- Lin Shuzhong 林中. 1998. *Haiwai cang zhongguo lidai minghua* 海外藏中国历代名画 [Famous Chinese paintings in overseas collections]. Changsha: Hunan Meishu Press.
- Liu Pujiang 刘浦江. 2003. "Songdai zongjiao de shisuhua yu pingminhua" 宋代宗教的世俗化与平民化 [Secularization and popularization of religions during the Song dynasty]. *Zhongguoshi yanjiu* 2:117–28.
- Ma Wei 马炜 and Meng Zhong 蒙中. 2012. *Xiyu huihua* 西域绘画 [Paintings from the Western Regions]. Chongqing: Chongqing Press.
- Matsumoto Eiichi 松本榮一. 1937. *Tonkōga no kenkyū* 敦煌畫の研究 [A study of Dunhuang paintings]. Tokyo: Tōhō Bunka Gakuin Tōkyō Kenkyūjo.
- Meng Cuicui 孟翠翠 and Yu Xiangdong 于向东. 2011. "Shuiyue Guanyin tuxiang de chuangzuo yiju" 水月观音图像的创作依据 [The basis for the creation of Water-Moon Avalokiteśvara paintings]. *Nanjing yishu xueyuan xuebao* 4: 68–72.
- Mun Myōngdae 문명대. 2015. "Ch'ōnok Pakkogwan sojang Sō Kubang p'il 1323nyōn chak Suwōl kwanūmdo yōn'gu" 泉屋博古館 소장 서구방(徐九方)필 1323년 작 수월관음도(水月觀音圖) 연구 [A study of the Water-Moon Avalokiteśvara painted in 1323 by Sō Kubang held by Sen'oku Hakukokan]. *Kangjwa misulsa* 45: 379–94.
- Naitō Konan 内藤湖南. 1992. "Gaikuo de tang song shidaiguan" 概括的唐宋时代观 [A summary of the worldviews of Tang and Song]. In *Ribe nxuezhe yanjiu zhongguo shilun zhuxuanze* 日本学者研究中国史论著选着 [Selected papers by Japanese scholars in Chinese history], vol. 1, edited by Liu Junwen, 10–16. Beijing: Zhonghua Shuju.
- Pak Chisōn 박지선. 1996. "Yi Hak sojang Koryō pulhwa 'Suwōl kwanūm' ūi pojon subok e kwanhayō" 이학 소장 고려불화 수월관음의 보존 수복에 관하여 [Restoration of the Koryō Buddhist painting "Koryō Water-Moon Avalokiteśvara" possessed by Mr. Yi Hak]. *Tanho munhwa yōn'gu* 1: 49–75.
- Pak Tohwa 박도화. 1998. "Koryō pulhwa wa Sōha pulhwa ūi tosangjōk kwallyōn sōng" 고려 불화와 서하 불화의 도상적 관련성 [The relationship between Koryō and Western Xia Buddhist paintings]. *Komunhwa* 52: 62–83.
- Pak Yongun 박용운. 1978. "Koryō chōn'gi munban kwa mugwan ūi sinbun munje: Koryō kwijok kamun yōn'gu (3)" 고려전기 문반과 무관의 신분 문제: 고려 귀족 가문 연구 (3) [The problem of the social status of civil and military officials in the early Koryō Dynasty: A study of Koryō aristocratic families (3)]. *Han'guksa yōn'gu* 21–22: 51–72.
- Pan Liangwen 潘亮文. 2000. "Shuiyue guanyin yu baiyi guanyin zaixiang zai zhongguo fazhan de gaikuang" 水月观音與白衣观音造像在中國發展的概況 [Overview of the development of Water-Moon Avalokiteśvara and White-Robed Avalokiteśvara images in China]. *Gugong wenwu* 故宫文物 212: 78–97.



- Pei Ruixin 裴瑞欣. 2010. "Lin Quan Gao Yi: Zhongguo huihua zhong de gaoshi xingxiang he chengxu" 林泉高逸: 中国绘画中的高士形象和程序 [The image and procedure of Gao Shi in Chinese painting]. *Yiyuan* 艺苑 5: 21–25.
- Powers, Martin J. 2013. "The Cultural Politics of the Brushstroke." *Art Bulletin* 95, no. 2: 312–27.
- Pyön Taesöp 변태섭. 1978. "Musinnan kwa Ch'oessi chöngkwön üi söngnip" 무신난과 최씨 정권의 성립 [The Musin military rebellion and the advent of rule by the Ch'oe family]. *Han'guksa* 7: 87–98.
- Qian Mu 錢穆. 1974. "Lixue yu yishu" 理學與藝術 [Neo-Confucianism and art]. In *Songshi yanjiuji* 宋史研究集 VII [Collected research findings of Song history VII], ed. by Taiwan Songshi zuotanhui 臺灣宋史座談會, 1–22. Taipei: Taiwan Shuju.
- Research Center for Ancient Calligraphy and Painting, Zhejiang University 浙江大学古书画研究中心, ed. 2008. *Songhua quanji* 宋畫全集 [Complete Song paintings]. Hangzhou: Zhejiang University Press.
- Research Center for Ancient Calligraphy and Painting, Zhejiang University 浙江大学古书画研究中心, ed. 2013. *Yuanhua quanji* 元畫全集 [Complete Yuan paintings]. Hangzhou: Zhejiang University Press.
- Ruan Rongchun 阮荣春 and Zhang Tongbiao 张同标. 2011. *Zhongguo fojiao meishu fazhanshi* 中国佛教美术发展史 [History of the development of Chinese Buddhist art]. Nanjing: Dongnan University Press.
- Shanghai Calligraphy and Painting Publishing House 上海书画出版社, ed. 2003. *Tanggong shinü* 唐宫仕女 [Tang palace ladies]. Shanghai: Shanghai Calligraphy and Painting Publishing House.
- Sim Yönok 심연옥. 2012. "Koryö pulhwa Suwölkwanümdo üi poksik chingmul kwa munyang" 고려 불화 수월관음도의 복식 직물과 문양 [Fabrics and patterns in Koryö Water-Moon Avalokiteśvara paintings]. *Misulshakyön'gu* 273: 5–33.
- Song Ünsök 송은석. 1999. "Koryö chönsu kwanümdo üi tosang e taehayö" 고려 천수관음도의 도상에 대하여 [On the imagery in Koryö paintings of the Thousand-Handed Avalokiteśvara]. *Hoam misulgwän yön'gu nonmunjip* 4: 30–59.
- Su Baidiao 苏百钧. 2018. *Lidai minghualu: Songdai huaniaohua xia* 历代名画录: 宋代花鸟下 [Famous paintings of dynasties past: Flowers and birds from the Song dynasty, part 2]. Jiangsu: Jiangsu Fine Arts Press 江苏美术出版社.
- Sun Changwu 孙昌武. 2000. *Zhongguo fojiao wenhuashi* 中国佛教文化史 [The history of Chinese Buddhist culture]. Beijing: Zhonghua Shuju.
- Sun Xizheng [Son Hüijöng] 孙希姪. 2007. "Nansong huafeng dui chaoxian bandao huihua de yingxiang" 南宋画风对朝鲜半岛绘画的影响 [The influence of Southern Song on the painting techniques of the Korean peninsula]. PhD diss., China Academy of Art.
- Wang Huimin 王惠民. 1987. "Dunhuang shuiyue guanyin xiang" 敦煌水月观音像 [Water-Moon Avalokiteśvara images in Dunhuang]. *Dunhuang yanjiu* 1:31–38.
- Wang Xiaoli 王晓丽. 2009. "Zhou Fang rennü renwuhua de 'Tangzhuang' yangshi" 周昉仕女人物画的唐状样式 [The 'Tang style' of Zhou Fang's female figure paintings]. MA thesis, Shandong Normal University.
- Xu Jianrong 徐建融. 1991. *Fojiao yu minzu huihua jingshen* 佛教与民族绘画精神 [Buddhism and the spirit of national paintings]. Shanghai: Shanghai Shuhua Chubanshe.
- Yamamoto Yöko 山本陽子. 1989. "Suigetsukannonno seiritsuni kansuru ichikötsatsu" 水月觀音圖の成立に關する壹考察 [An examination of the rise of Water and Moon Kuan-Yin paintings]. *Bijutsushi* 125: 28–38.
- Yan Yamei 嚴雅美. 2000. "Shilun songyuan chanzong huihua" 試論宋元禪宗繪畫 [A study of Zen Buddhist paintings of the Song and Yuan]. *Zhonghua foxue yanjiusuo* 4: 207–60.

- Yi Hyönju 이현주. 2016. “Song-Wöndae sumuk Suwöl kwanümdoyön’gu” 송원대 수묵 수월관음도 연구 [A study of Song and Yuan dynasty ink-wash painted Water-Moon Avalokiteśvara]. *Kangjwa misulsa* 47: 209–29.
- Yi Hyönju 이현주. 2019. “Suwöl kwanümdo ro pon Koryö wa Chungguk Kangnam chiyök kwaüi hoehwa kyoryu” 수월관음도로 본 고려와 중국 강남지역과의 회화 교류 [Research on pictorial interchanges of Water-Moon Avalokiteśvara between Koryö and Jiangnan China]. *Kangjwa misulsa* 53: 199–216.
- Yi Kyönghui 이경희. 1987. “Koryö hugi suwöl kwanümdo yön’gu” 고려 후기 수월관음도 연구 [A study of paintings of Water-Moon Avalokiteśvara in late Koryö]. MA thesis, Hongik University.
- Yi Namhui 이남희. 2013. “Koryö sidae kwagöje wa konggong söng” 고려시대 과거제와 공공성 [The Koryö imperial examination system and its public nature]. *Tongyang chöngch’i sasangsa* 12: 57–76.
- Yi T’aesüng 이태승. 1997. “Koryö pulhwa e sayong doen allyowa kiböp e taehan munhönjök koch’al” 고려불화에 사용된 안료와 기법에 대한 문헌적 고찰 [A philological study of the paints and techniques used in Koryö Buddhist paintings]. *Chohyöng nonch’ong* 2: 45–51.
- Yi Tongju 이동주. 1981. *Koryöpulhwa: Han’guk üi mi* 7 고려불화: 한국의 미 7 [Buddhist paintings of Koryö: The beauty of Korea, vol. 7]. Seoul: Korea Joong Ang Daily.
- Yu Junfang 于君方. 2012. *Guanyin-pusa zhongguohua de yanbian* 观音-菩萨中国化的演变 [The evolution of Avalokiteśvara in Chinese paintings]. Beijing: Commercial Press.
- Yu Xinhua 余信华. 2014. *Zhao Mengfu xinjing* 赵孟頫心经 [Zhao Mengfu’s Heart Sutra]. Hangzhou: Xilingyinshe Press.
- Zhou Ying 周鹰 and Wu Jing 吴晶. 2012. *Nansong meixue sixiang yanjiu* 南宋美学思想研究 [A study of the aesthetic thought of the Southern Song dynasty]. Shanghai: Shanghai Guji Press.
